# Supplementary material for: 2‐ and 2,7‐Substituted para‐N‐Methylpyridinium Pyrenes: Syntheses, Molecular and Electronic Structures, Photophysical, Electrochemical, and Spectroelectrochemical Properties and Binding to Double‐Stranded (ds) DNA
Source: PubMed Central journal article supplement (PMC7898908; doi:10.1002/chem.202004748), 2021-01-07
Supplement: CHEM-27-2837-s001.pdf [file CHEM-27-2837-s001.pdf]

# Chemistry–A European Journal

Supporting Information

## **2- and 2,7-Substituted *para*-N-Methylpyridinium Pyrenes: Syntheses, Molecular and Electronic Structures, Photophysical, Electrochemical, and Spectroelectrochemical Properties and Binding to Double-Stranded (ds) DNA**

Goutam Kumar Kole,<sup>[a, b]</sup> Julia Merz,<sup>[a]</sup> Anissa Amar,<sup>[c]</sup> Bruno Fontaine,<sup>[d]</sup> Abdou Boucekkine,<sup>[d]</sup> Jörn Nitsch,<sup>[a]</sup> Sabine Lorenzen,<sup>[a]</sup> Alexandra Friedrich,<sup>[a]</sup> Ivo Krummenacher,<sup>[a]</sup> Marta Koščák,<sup>[e]</sup> Holger Braunschweig,<sup>[a]</sup> Ivo Piantanida,<sup>\*[e]</sup> Jean-François Halet,<sup>\*[d]</sup> Klaus Müller-Buschbaum,<sup>\*[f]</sup> and Todd B. Marder<sup>\*[a]</sup>

## Table of Contents

|                                                                             |           |
|-----------------------------------------------------------------------------|-----------|
| NMR spectra                                                                 | S2 – S7   |
| Crystallographic table                                                      | S8        |
| Additional diagrams for single crystal X-ray structures                     | S9 – S15  |
| Powder X-ray diffraction studies                                            | S16       |
| Additional absorption, excitation and emission spectra                      | S17 – S18 |
| Spectroelectrochemical measurements                                         | S19 – S20 |
| Theoretically optimized and experimentally determined structural parameters | S21       |
| Coordinates of the optimized geometries                                     | S21 – S24 |
| Calculated electronic transitions                                           | S25       |
| Calculated and experimentally observed absorption and emission wavelengths  | S26 – S27 |
| Molecular orbital energy diagrams                                           | S28       |
| Study of interactions with ds-DNA                                           | S29 – S35 |
| Reference                                                                   | S36       |

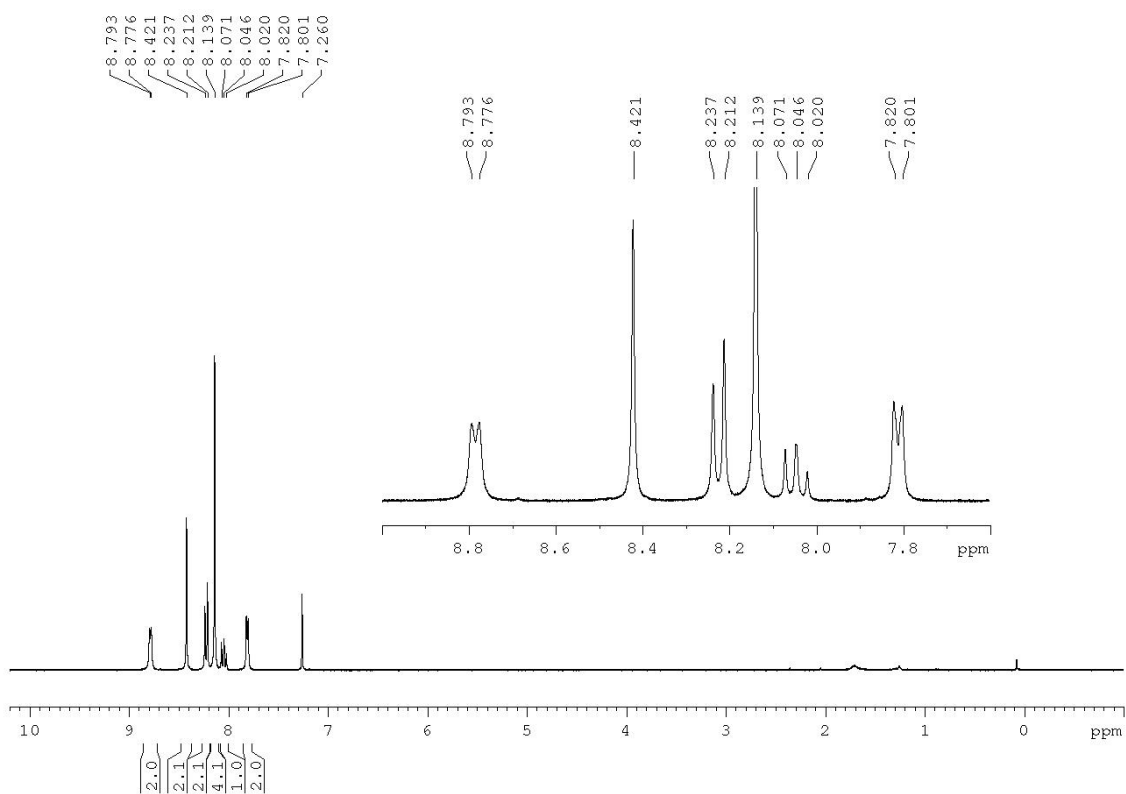

Figure S1:  $^1\text{H}$  NMR (300 MHz,  $\text{CDCl}_3$ ) spectrum of **1**.

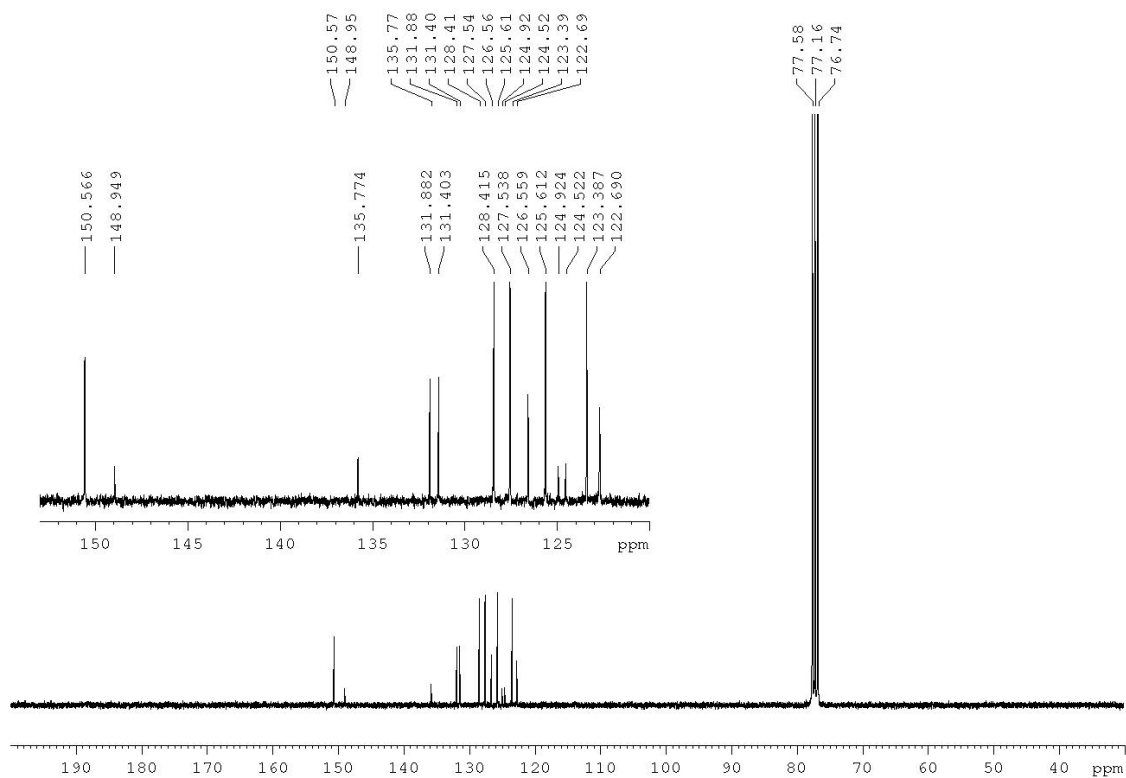

Figure S2:  $^{13}\text{C}\{^1\text{H}\}$  NMR (75 MHz,  $\text{CDCl}_3$ ) spectrum of **1**.

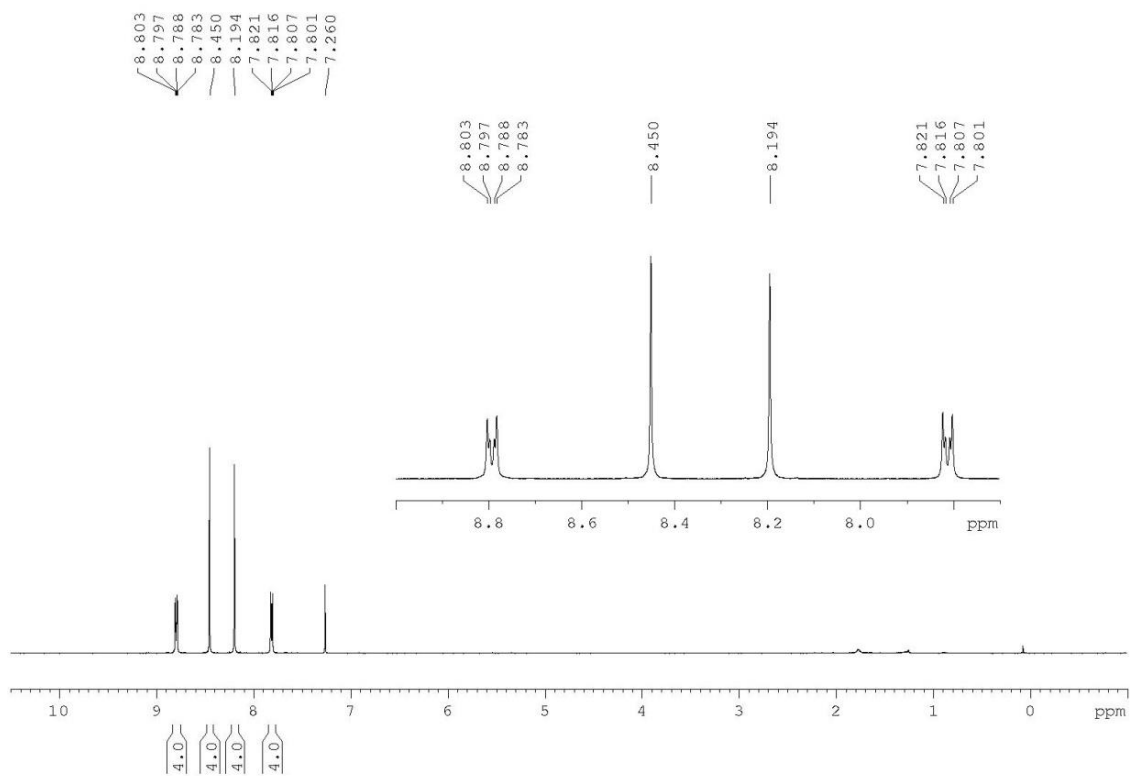

Figure S3:  $^1\text{H}$  NMR (300 MHz,  $\text{CDCl}_3$ ) spectrum of **2**.

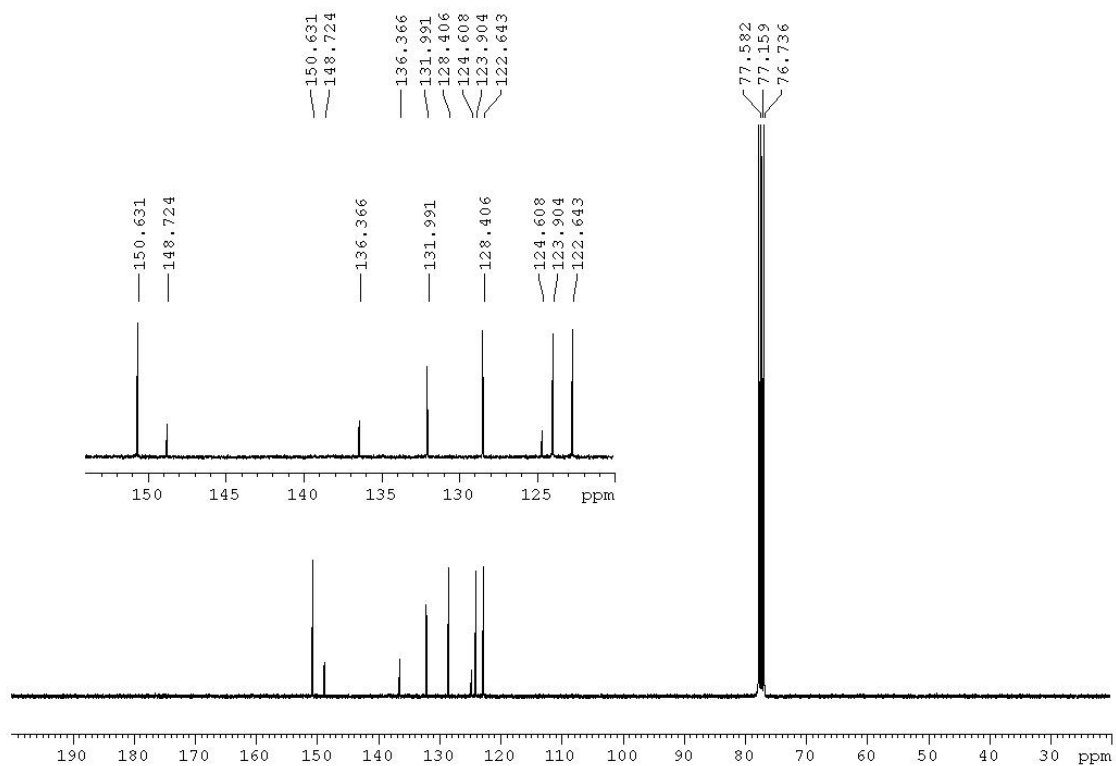

Figure S4:  $^{13}\text{C}\{^1\text{H}\}$  NMR (75 MHz,  $\text{CDCl}_3$ ) spectrum of **2**.

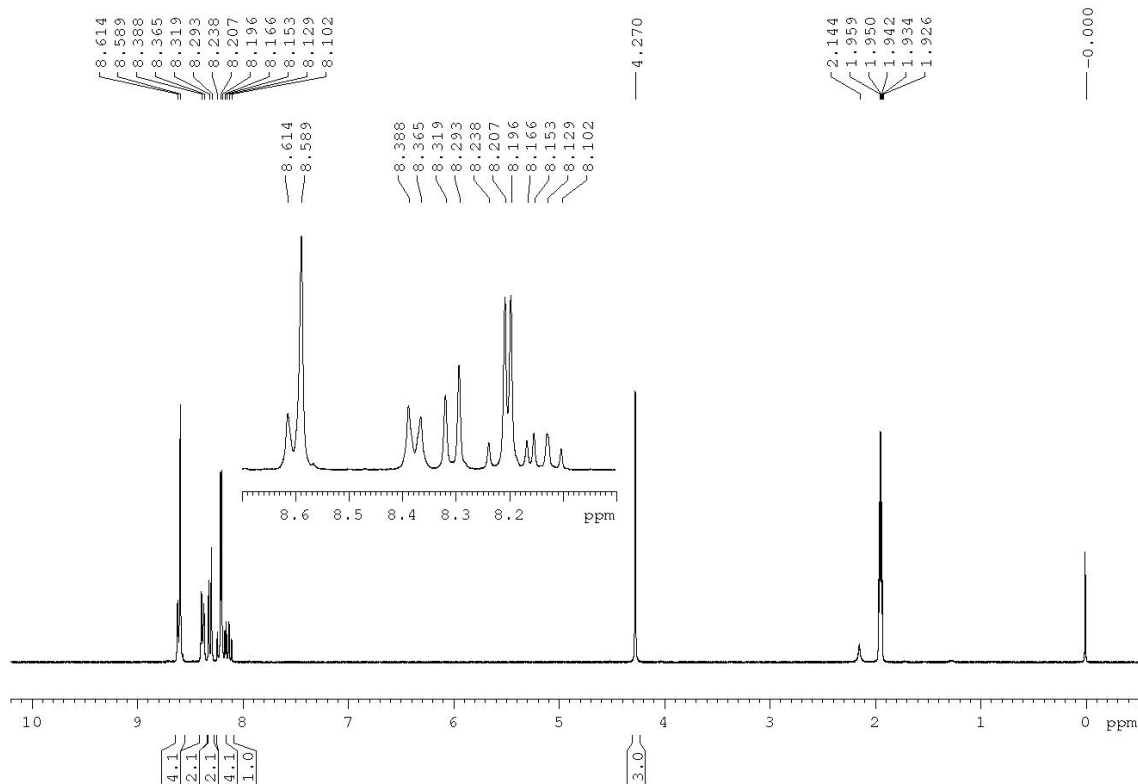

Figure S5:  $^1\text{H}$  NMR (300 MHz,  $\text{CD}_3\text{CN}$  with 0.3 % TMS) spectrum of **1M**.

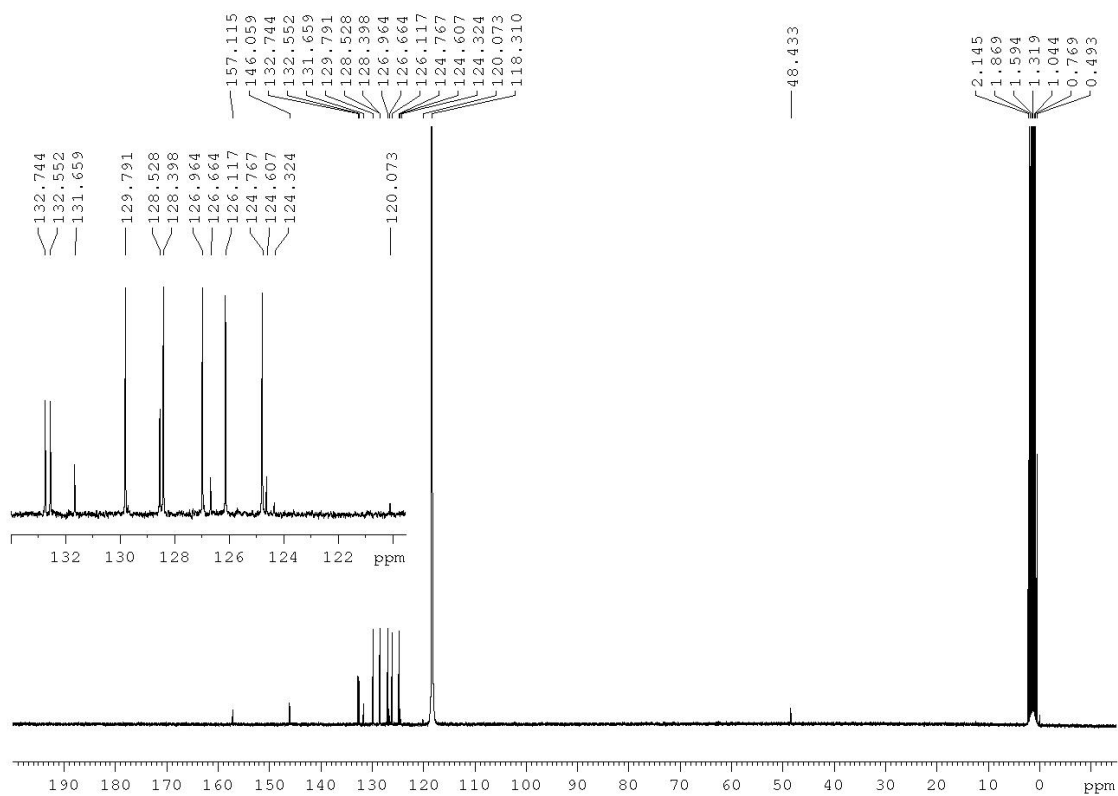

Figure S6:  $^{13}\text{C}\{^1\text{H}\}$  NMR (75 MHz,  $\text{CD}_3\text{CN}$  with 0.3 % TMS) spectrum of **1M**.

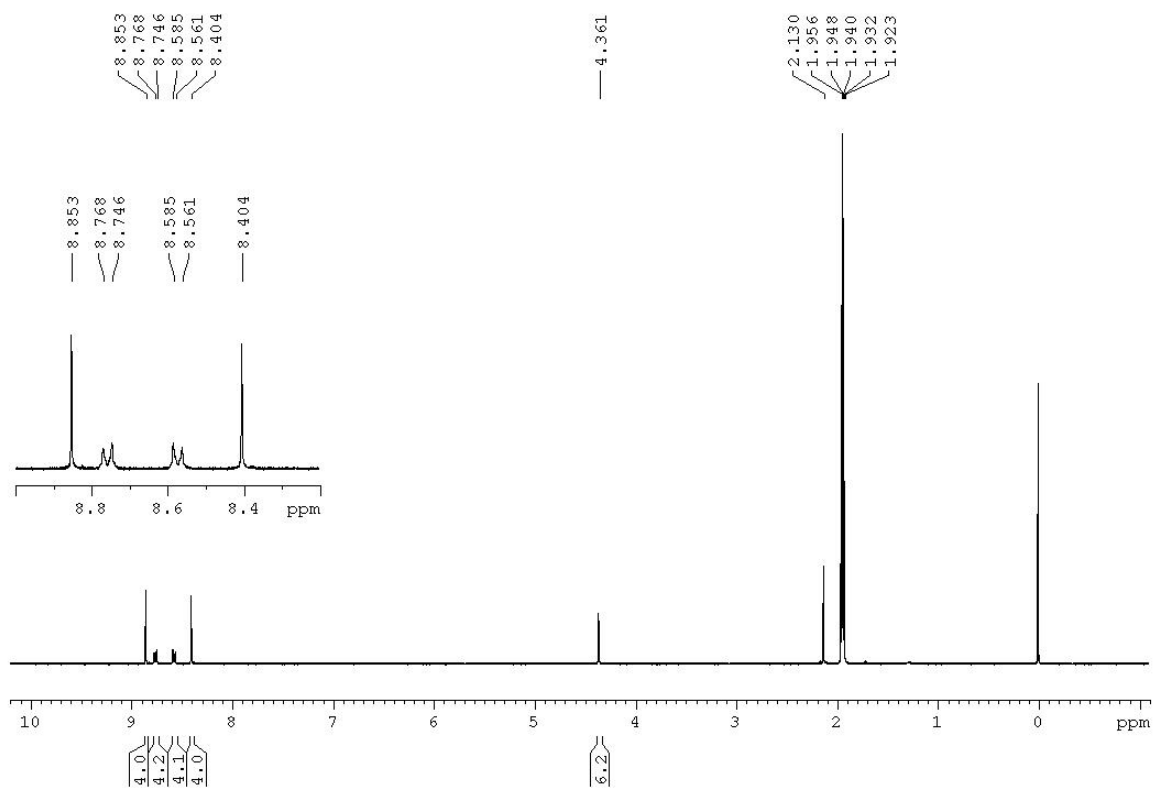

Figure S7:  $^1\text{H}$  NMR (300 MHz,  $\text{CD}_3\text{CN}$  with 0.3 % TMS) spectrum of **2M**.

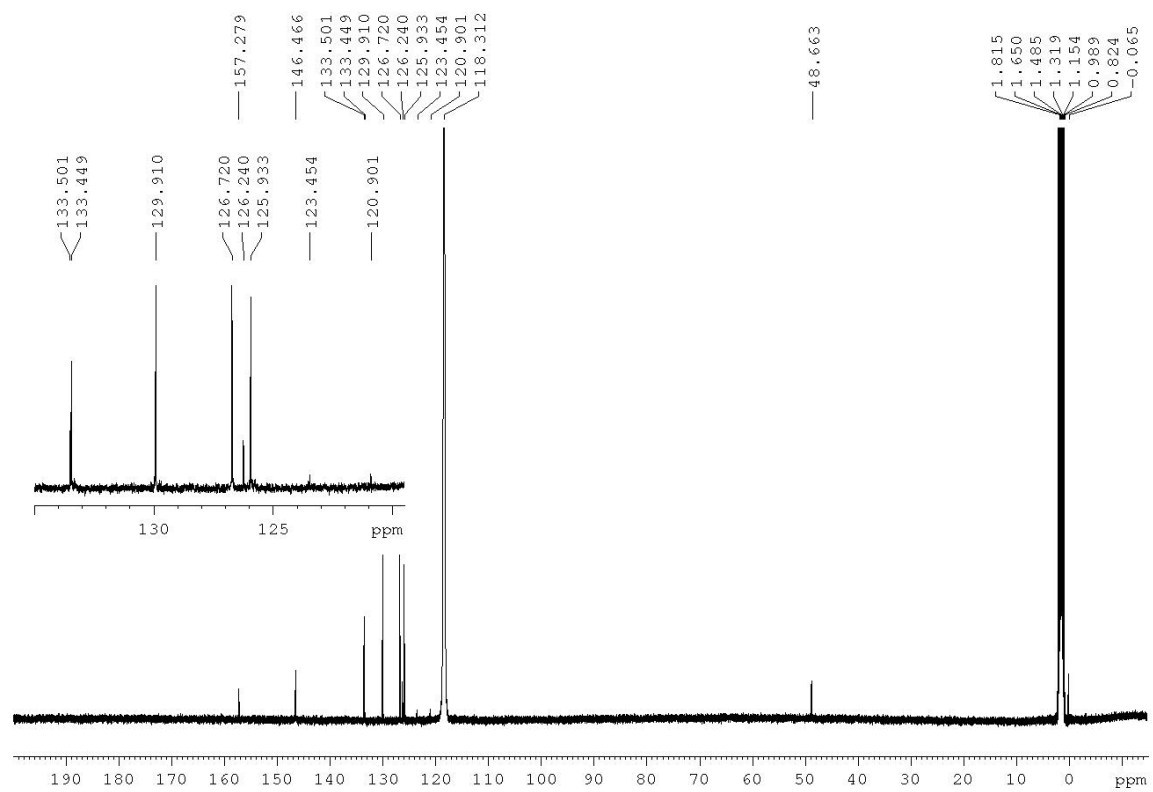

Figure S8:  $^{13}\text{C}\{^1\text{H}\}$  NMR (75 MHz,  $\text{CD}_3\text{CN}$  with 0.3 % TMS) spectrum of **2M**.

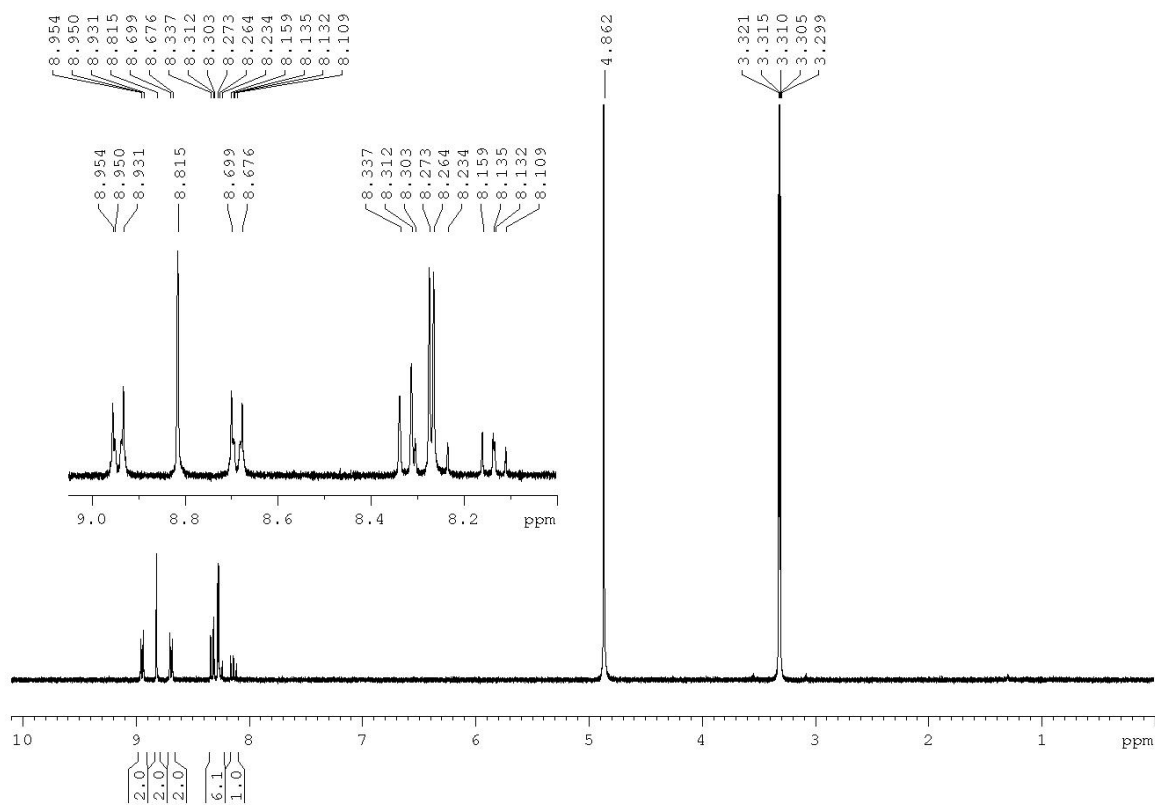

Figure S9:  $^1\text{H}$  NMR (300 MHz,  $d_4$ -MeOD) spectrum of **1H**.

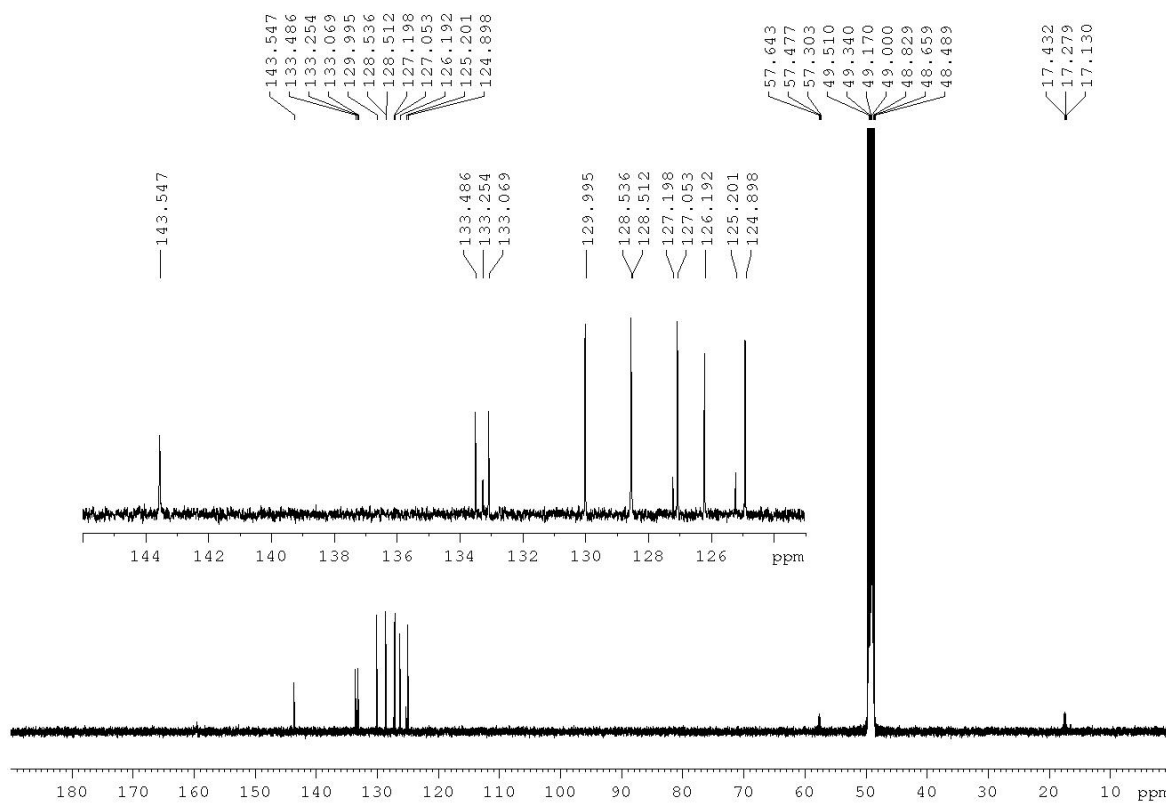

Figure S10:  $^{13}\text{C}$  NMR (75 MHz,  $d_4$ -MeOD) spectrum of **1H**. The impurity peak at 17.3 and 57.5 may be due to ethanol.

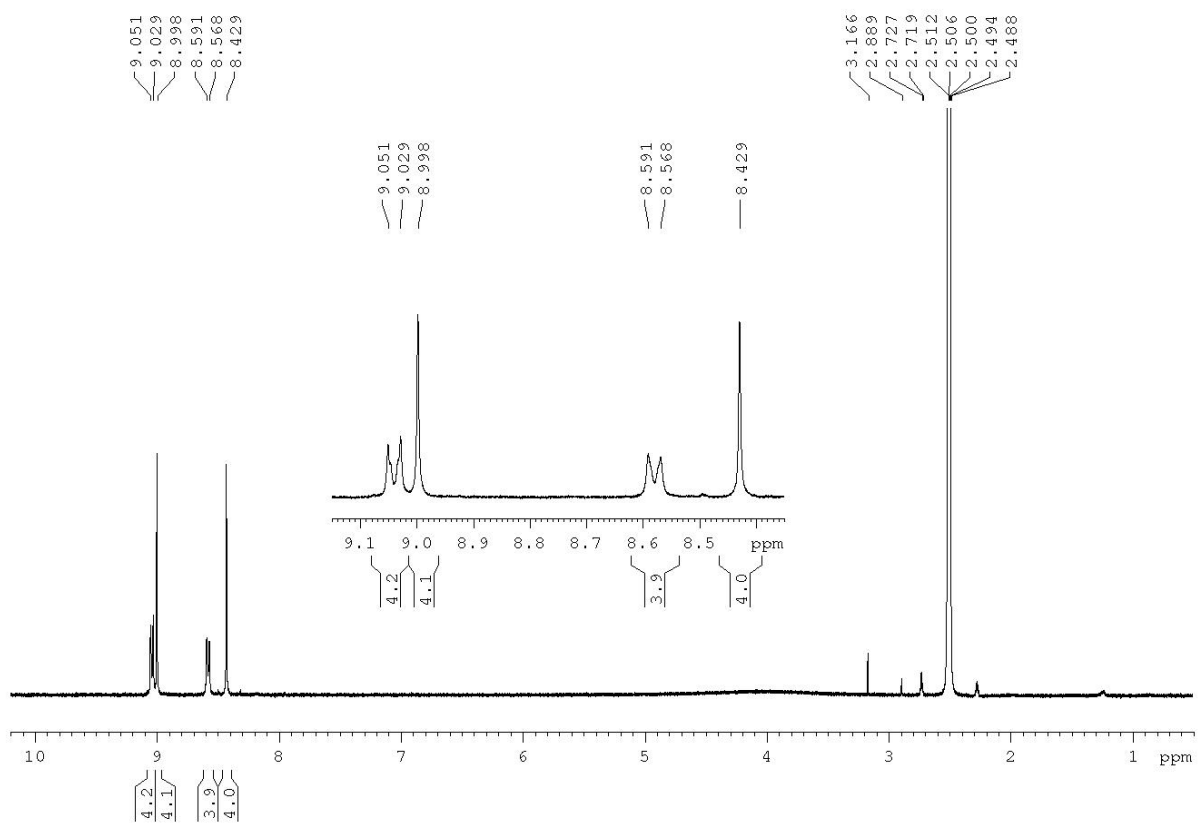

Figure S11:  $^1\text{H}$  NMR (300 MHz,  $\text{DMSO-}d_6$ ) spectrum of **2H**.



**Table S1.** Crystallographic data for **1M**, **2M**, **1H** and **2H**.

| Data                                                                         | <b>1M</b>                                                         | <b>2M</b>                                                                           | <b>1H</b>                                                     | <b>2H</b>                                                     |
|------------------------------------------------------------------------------|-------------------------------------------------------------------|-------------------------------------------------------------------------------------|---------------------------------------------------------------|---------------------------------------------------------------|
| CCDC number                                                                  | 2016794                                                           | 2016796                                                                             | 2016793                                                       | 2016795                                                       |
| Empirical formula                                                            | C <sub>22</sub> H <sub>16</sub> N·CF <sub>3</sub> SO <sub>3</sub> | C <sub>28</sub> H <sub>22</sub> N <sub>2</sub> ·2(CF <sub>3</sub> SO <sub>3</sub> ) | C <sub>21</sub> H <sub>14</sub> N <sub>2</sub> O <sub>3</sub> | C <sub>26</sub> H <sub>18</sub> N <sub>4</sub> O <sub>6</sub> |
| Formula weight (g·mol <sup>-1</sup> )                                        | 443.43                                                            | 684.61                                                                              | 342.34                                                        | 482.44                                                        |
| Temperature (K)                                                              | 100(2)                                                            | 100(2)                                                                              | 100(2)                                                        | 100(2)                                                        |
| Radiation, λ (Å)                                                             | MoK <sub>α</sub> 0.71073                                          | MoK <sub>α</sub> 0.71073                                                            | MoK <sub>α</sub> 0.71073                                      | MoK <sub>α</sub> 0.71073                                      |
| Crystal colour, habit                                                        | yellow, needle                                                    | yellow, needle                                                                      | yellow, needle                                                | orange, needle                                                |
| Crystal size (mm <sup>3</sup> )                                              | 0.328 × 0.179 ×<br>0.176                                          | 0.563 × 0.299 ×<br>0.286                                                            | 0.373 × 0.138 ×<br>0.073                                      | 0.427 × 0.123 ×<br>× 0.054                                    |
| Crystal system                                                               | Monoclinic                                                        | Monoclinic                                                                          | Monoclinic                                                    | Monoclinic                                                    |
| Space group                                                                  | <i>P</i> 2 <sub>1</sub>                                           | <i>C</i> 2/ <i>m</i>                                                                | <i>P</i> 2 <sub>1</sub> / <i>c</i>                            | <i>P</i> 2 <sub>1</sub> / <i>c</i>                            |
| <i>Unit cell dimensions</i>                                                  |                                                                   |                                                                                     |                                                               |                                                               |
| <i>a</i> (Å)                                                                 | 7.2780(11)                                                        | 24.927(6)                                                                           | 6.735(2)                                                      | 6.6546(14)                                                    |
| <i>b</i> (Å)                                                                 | 21.936(3)                                                         | 8.910(2)                                                                            | 15.441(6)                                                     | 8.9410(19)                                                    |
| <i>c</i> (Å)                                                                 | 12.115(2)                                                         | 6.5960(17)                                                                          | 15.144(6)                                                     | 17.965(4)                                                     |
| <i>α</i> (°)                                                                 | 90                                                                | 90                                                                                  | 90                                                            | 90                                                            |
| <i>β</i> (°)                                                                 | 95.766(15)                                                        | 96.199(7)                                                                           | 101.21(2)                                                     | 97.259(5)                                                     |
| <i>γ</i> (°)                                                                 | 90                                                                | 90                                                                                  | 90                                                            | 90                                                            |
| Volume (Å <sup>3</sup> )                                                     | 1924.4(5)                                                         | 1456.4(6)                                                                           | 1544.7(10)                                                    | 1060.4(4)                                                     |
| <i>Z</i>                                                                     | 4                                                                 | 2                                                                                   | 4                                                             | 2                                                             |
| Calculated density (Mg·m <sup>-3</sup> )                                     | 1.531                                                             | 1.561                                                                               | 1.472                                                         | 1.511                                                         |
| <i>μ</i> (mm <sup>-1</sup> )                                                 | 0.224                                                             | 0.270                                                                               | 0.100                                                         | 0.110                                                         |
| <i>F</i> (000)                                                               | 912                                                               | 700                                                                                 | 712                                                           | 500                                                           |
| <i>θ</i> range (°)                                                           | 1.689 – 26.372                                                    | 2.429 – 26.363                                                                      | 2.638 – 26.372                                                | 3.601 – 26.360                                                |
| Reflections collected                                                        | 50468                                                             | 12326                                                                               | 21948                                                         | 25725                                                         |
| Independent reflections                                                      | 7855                                                              | 1592                                                                                | 3152                                                          | 2159                                                          |
| Minimum/maximum transmission                                                 | 0.7174/0.7457                                                     | 0.5801/0.7457                                                                       | 0.6834/0.7244                                                 | 0.6616/0.7456                                                 |
| Parameters / restraints                                                      | 562 / 643                                                         | 142 / 8                                                                             | 236 / 0                                                       | 163 / 0                                                       |
| GooF on <i>F</i> <sup>2</sup>                                                | 1.026                                                             | 1.069                                                                               | 0.962                                                         | 1.053                                                         |
| R1 [ <i>I</i> > 2σ( <i>I</i> )]                                              | 0.0278                                                            | 0.0482                                                                              | 0.0494                                                        | 0.0546                                                        |
| wR <sup>2</sup> (all data)                                                   | 0.0751                                                            | 0.1409                                                                              | 0.1266                                                        | 0.1461                                                        |
| Maximum/minimum residual electron density (e <sup>-</sup> ·Å <sup>-3</sup> ) | 0.261 / -0.238                                                    | 0.412 / -0.324                                                                      | 0.333 / -0.282                                                | 0.393 / -0.244                                                |

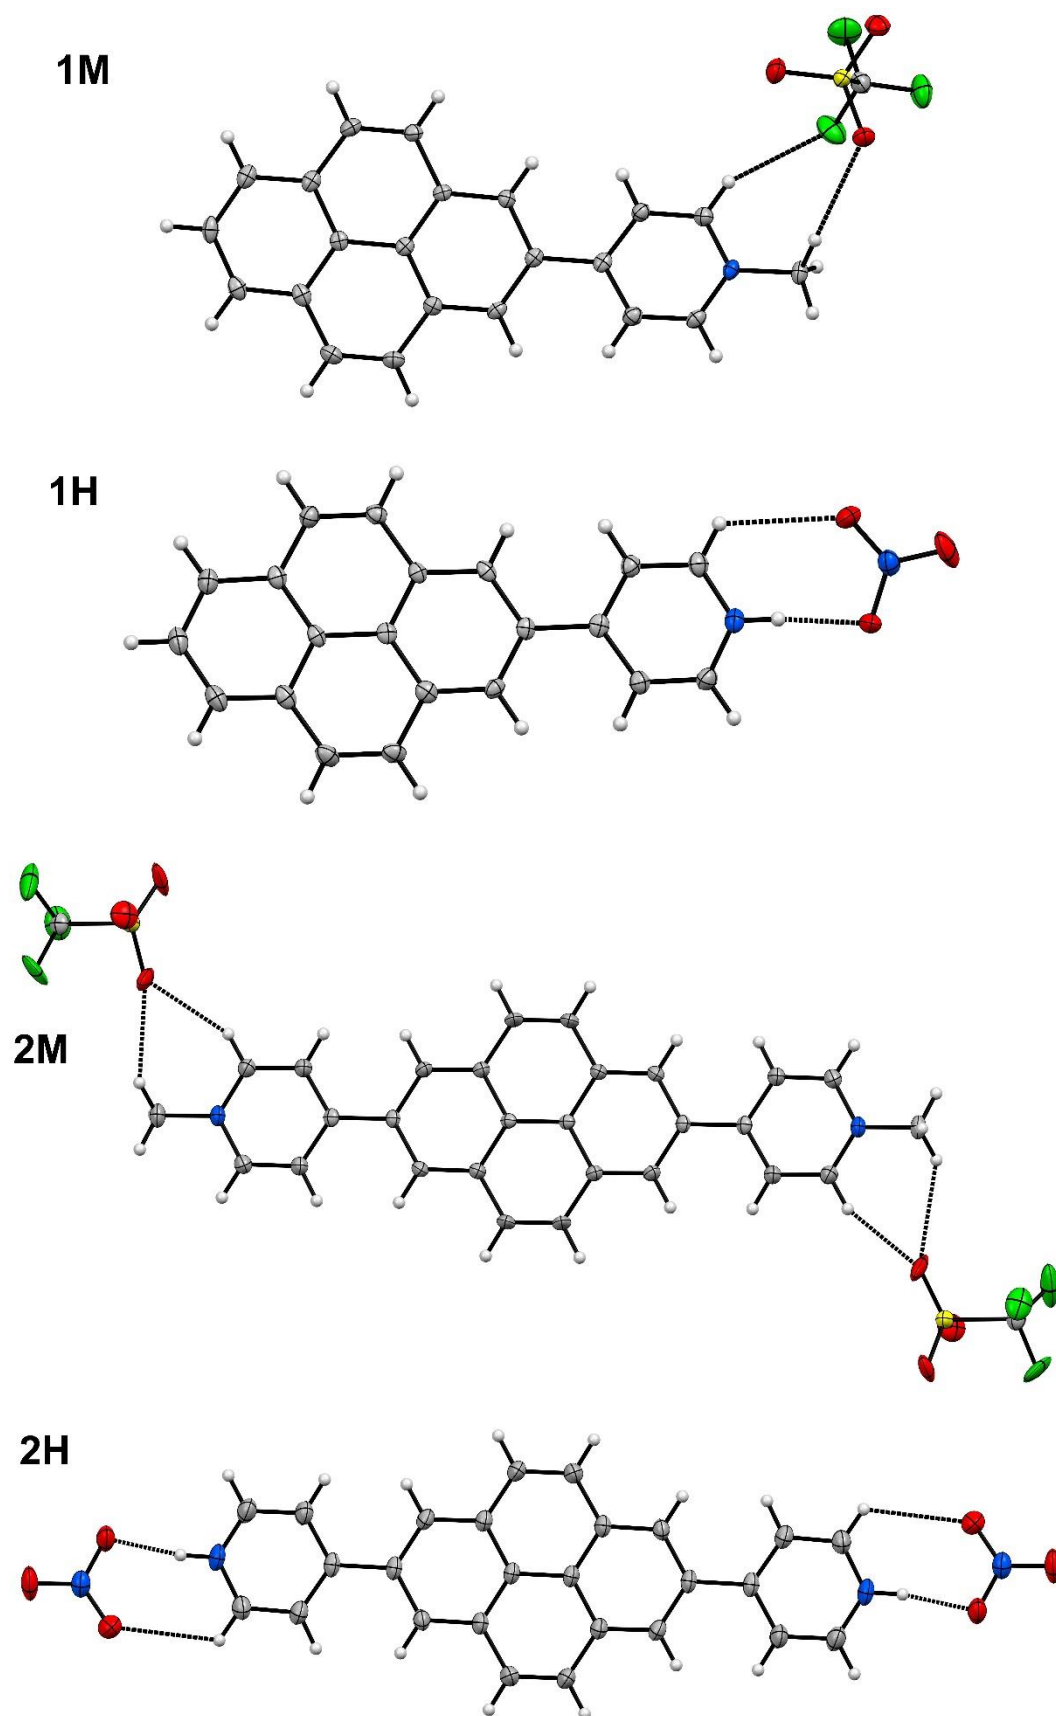

Figure S12: Molecular structures of **1M**, **1H**, **2M**, and **2H** in the solid state at 100 K. The atomic displacement ellipsoids are drawn with 50% probabilities. Colour codes: grey: carbon, blue: nitrogen, red: oxygen, green: fluorine, yellow: sulphur, and white: hydrogen.

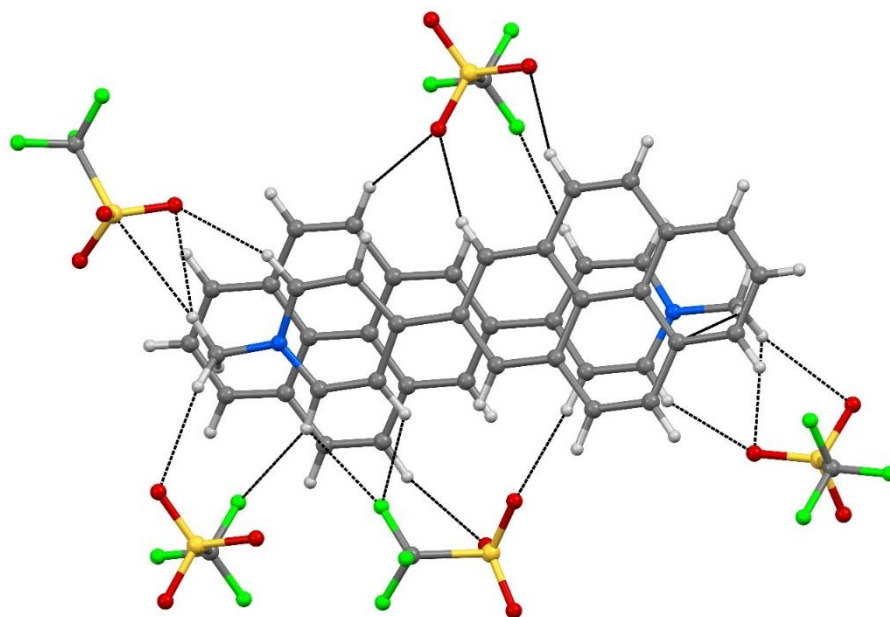

Figure S13: Projection of part of the crystal structure of **1M** along the *a*-axis. The stacking of the cations and various weak interactions with the surrounding triflate anions are shown. Colour codes: grey: carbon, blue: nitrogen, red: oxygen, green: fluorine, yellow: sulphur, and white: hydrogen.

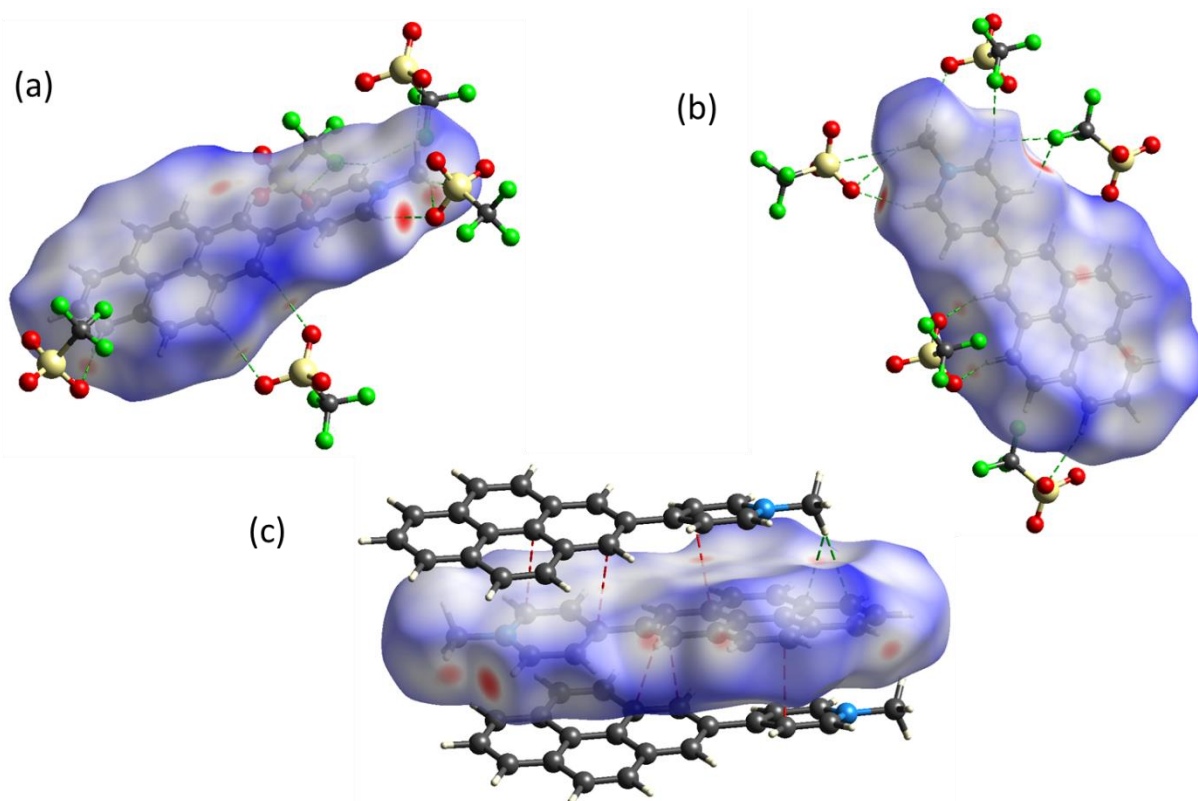

Figure S14: Hirshfeld surface for **1M**. Various interactions ( $\text{C-F}\cdots\text{C}$ ,  $\text{C-H}\cdots\text{O}$  and  $\text{C-H}\cdots\text{S}$ ) between the cation and triflate anion are shown in (a) and (b), while (c) shows  $\pi$ -stacking and  $\text{C-H}\cdots\pi$  interactions. Red areas indicate strong interactions, white areas moderate interactions and blue areas no significant interactions. Atom colour: black: carbon, red: oxygen, blue: nitrogen, green: fluorine, yellow: sulphur, and white: hydrogen.

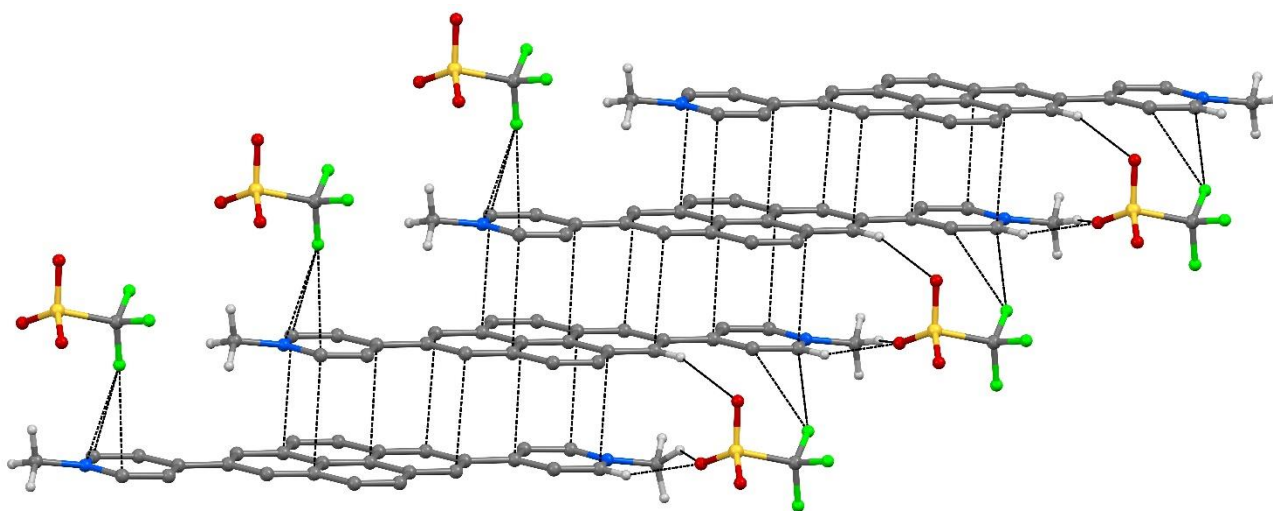

Figure S15. The infinite offset parallel stacking of the dication in **2M** and its various weak C–F $\cdots$  $\pi$  and C–H $\cdots$ O interactions with the triflate anion are shown. Only selected hydrogen atoms are shown for clarity. Colour codes: grey: carbon, blue: nitrogen, red: oxygen, green: fluorine, yellow: sulphur, and white: hydrogen.

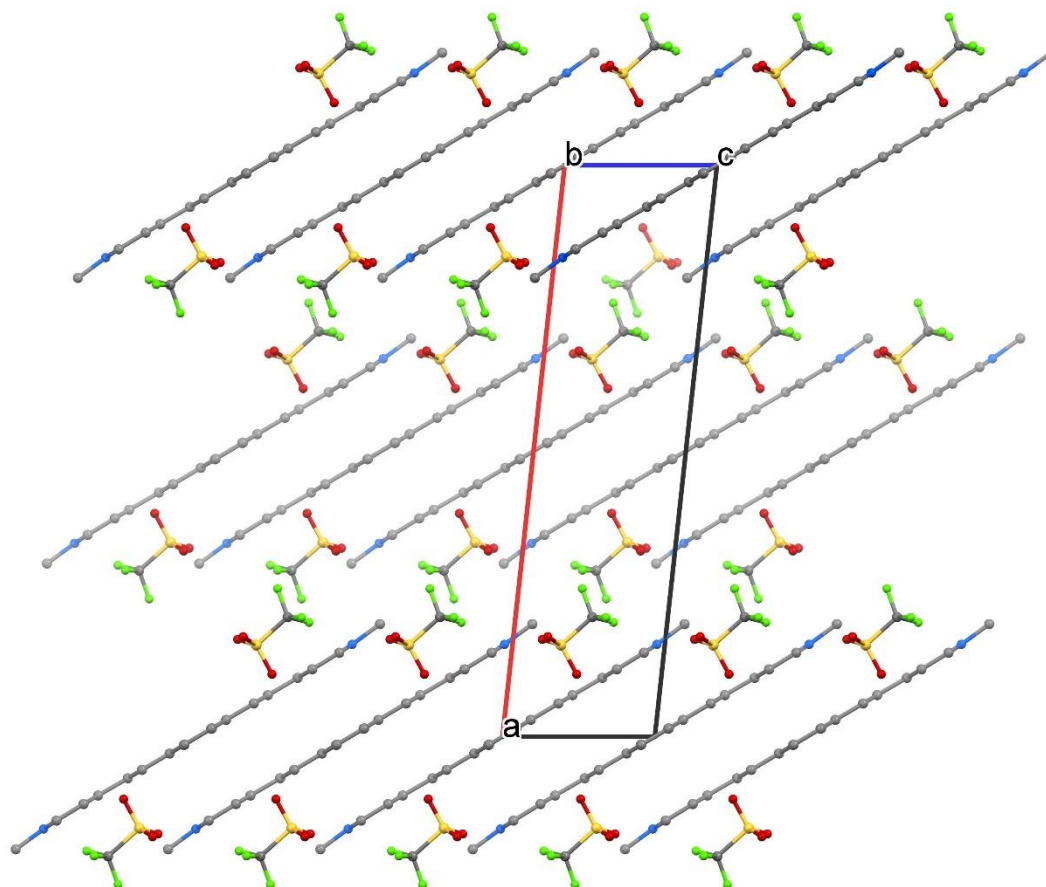

Figure S16: View of the crystal packing of **2M** along the *b*-axis. The side view shows the planarity of the dication and the offset parallel stacking. Hydrogen atoms are omitted for clarity. Colour codes: grey: carbon, blue: nitrogen, red: oxygen, green: fluorine, yellow: sulphur, and white: hydrogen.

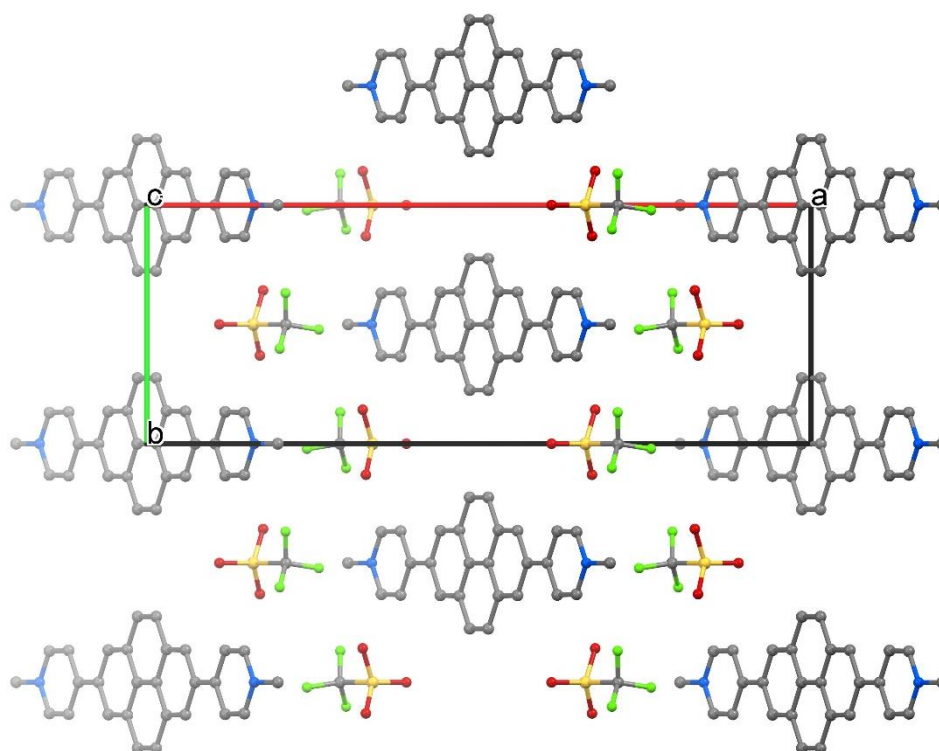

Figure S17: View of the crystal packing of **2M** along the *c*-axis, which is the stacking direction. Hydrogen atoms are omitted for clarity. Colour codes: grey: carbon, blue: nitrogen, red: oxygen, green: fluorine, yellow: sulphur, and white: hydrogen.

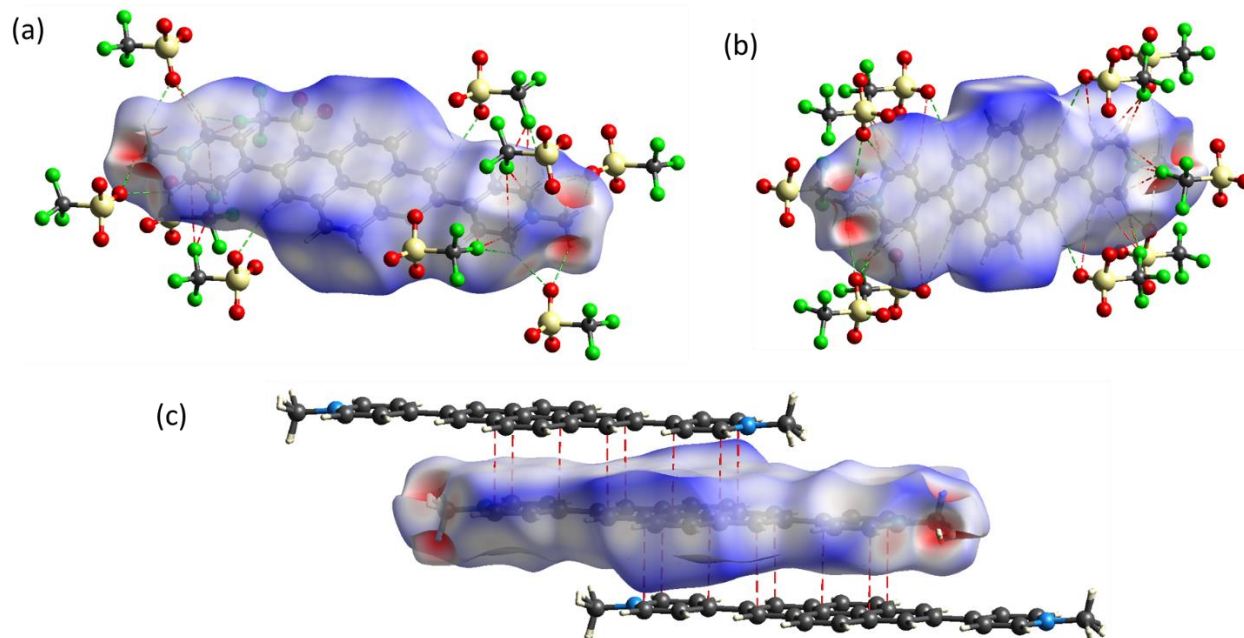

Figure S18: Hirshfeld surface for **2M**. Various interactions ( $\text{C-F}\cdots\text{C}$  and  $\text{C-H}\cdots\text{O}$ ) between the dication and triflate anions are shown in (a) and (b), while (c) shows  $\pi$ -stacking interactions. Red areas indicate strong interactions, white areas moderate interactions and blue areas no significant interactions. Atom colour: black: carbon, red: oxygen, blue: nitrogen, green: fluorine, yellow: sulphur, and white: hydrogen.



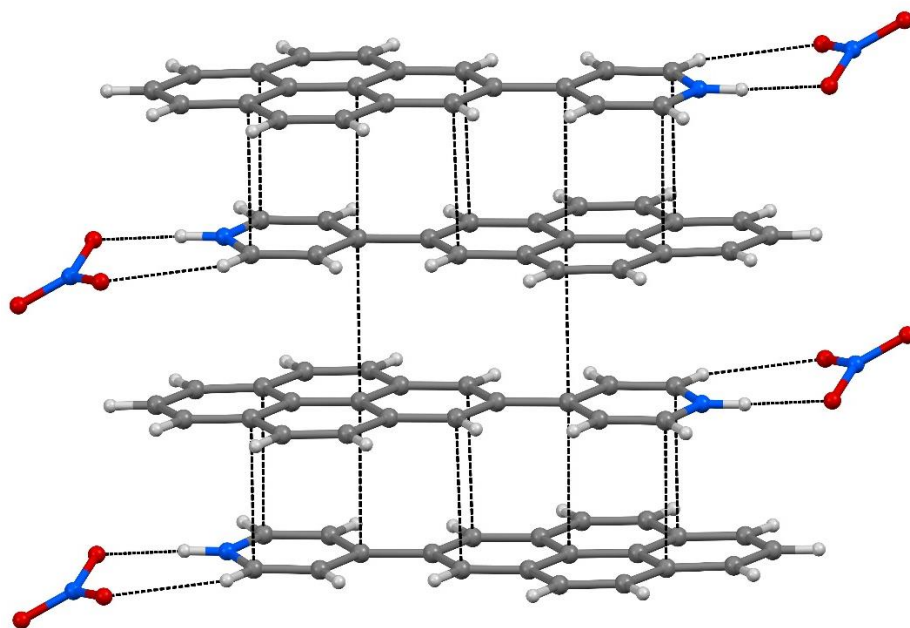

Figure S19: The crystal structure of **1H** shows the infinite parallel  $\pi$ -stacking of the cation in *head-to-tail* (anti) fashion. Various intermolecular interactions ( $C\cdots C$ ,  $C-H\cdots O$ , and  $N-H\cdots O$ ) are plotted. Colour codes: grey: carbon, blue: nitrogen, red: oxygen, and white: hydrogen.

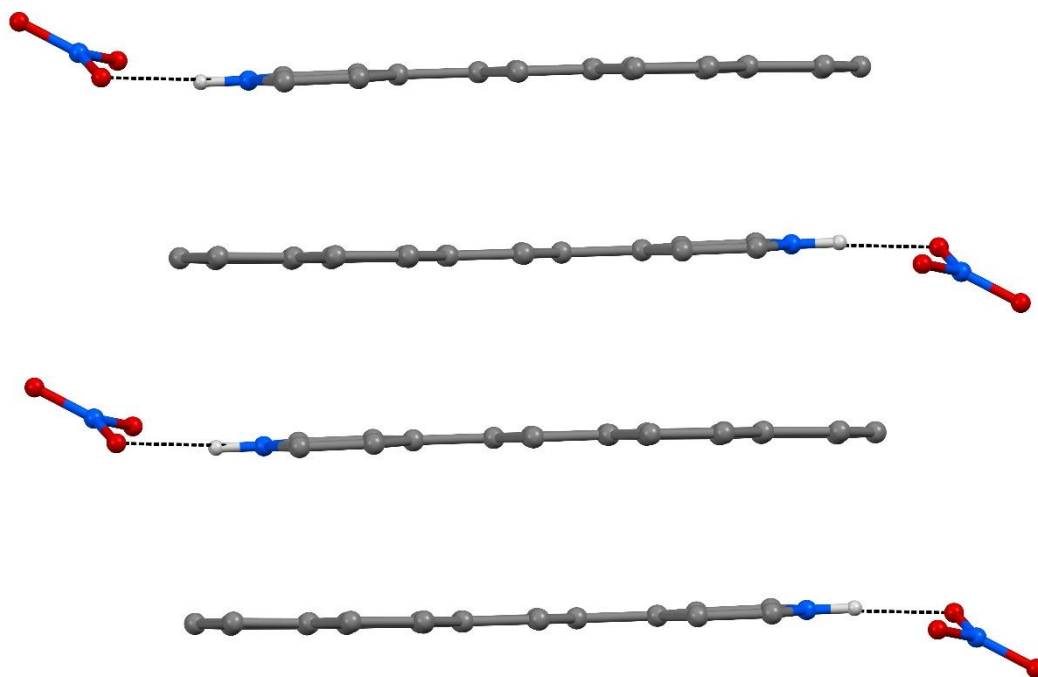

Figure S20: The side view of the cation in **1H** shows its near-planarity and the anti-parallel  $\pi$ -stacking arrangement. Only selected hydrogen atoms are shown for clarity. Colour codes: grey: carbon, blue: nitrogen, red: oxygen, and white: hydrogen.

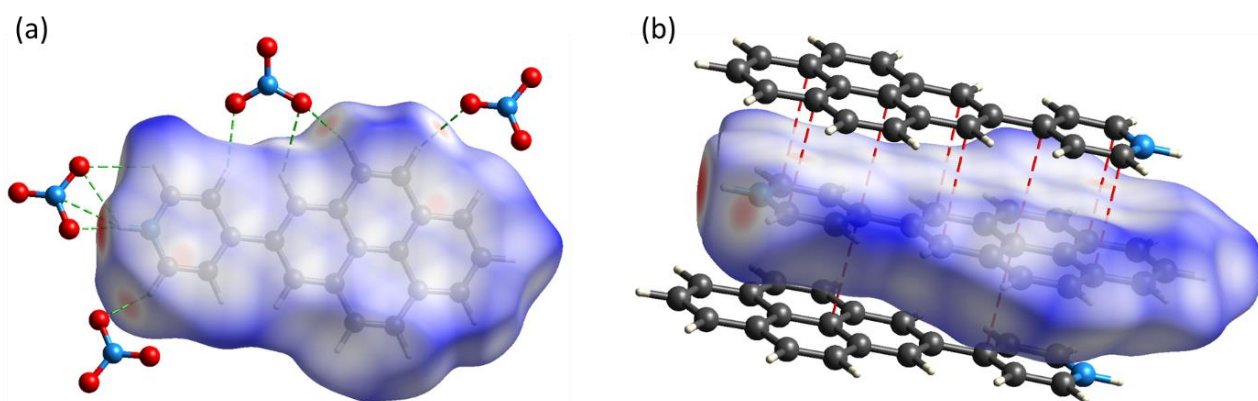

Figure S21: Hirshfeld surface for **1H**. The N–H···O and weak C–H···O hydrogen bonds are shown in (a), while the  $\pi$ -stacking interactions are shown in (b). Red areas indicate strong interactions, white areas moderate interactions and blue areas no significant interactions. Atom colour: black: carbon, red: oxygen, blue: nitrogen, and white: hydrogen.

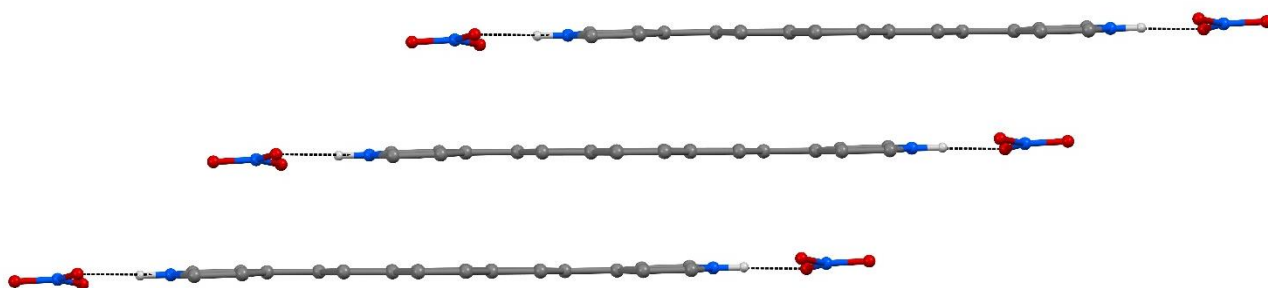

Figure S22: The side view of the cation in **2H** shows the planarity of the dication and the offset parallel  $\pi$ -stacking. Only selected hydrogen atoms are shown for clarity. Colour codes: grey: carbon, blue: nitrogen, red: oxygen, and white: hydrogen.

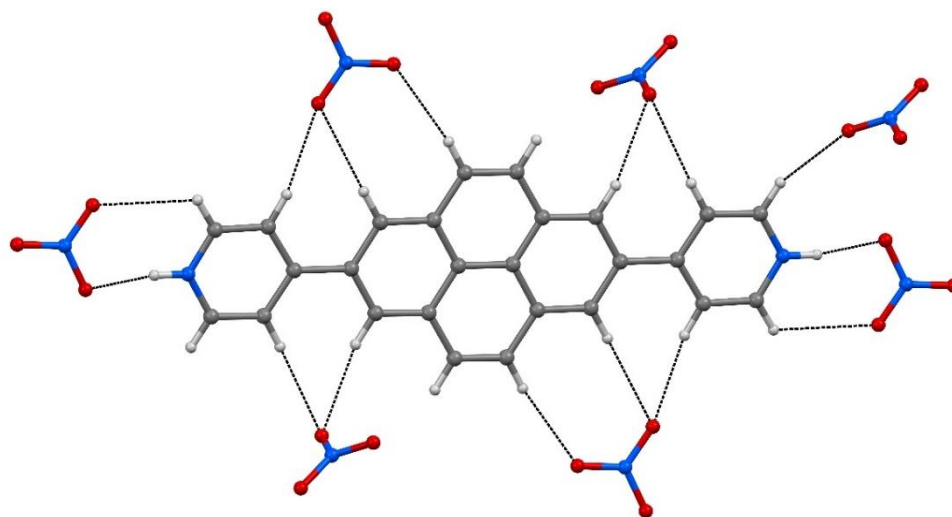

Figure S23: Weak intermolecular N-H $\cdots$ O and C-H $\cdots$ O interactions are shown between the dication in **2H** and the surrounding nitrate ions. Colour codes: grey: carbon, blue: nitrogen, red: oxygen, and white: hydrogen.

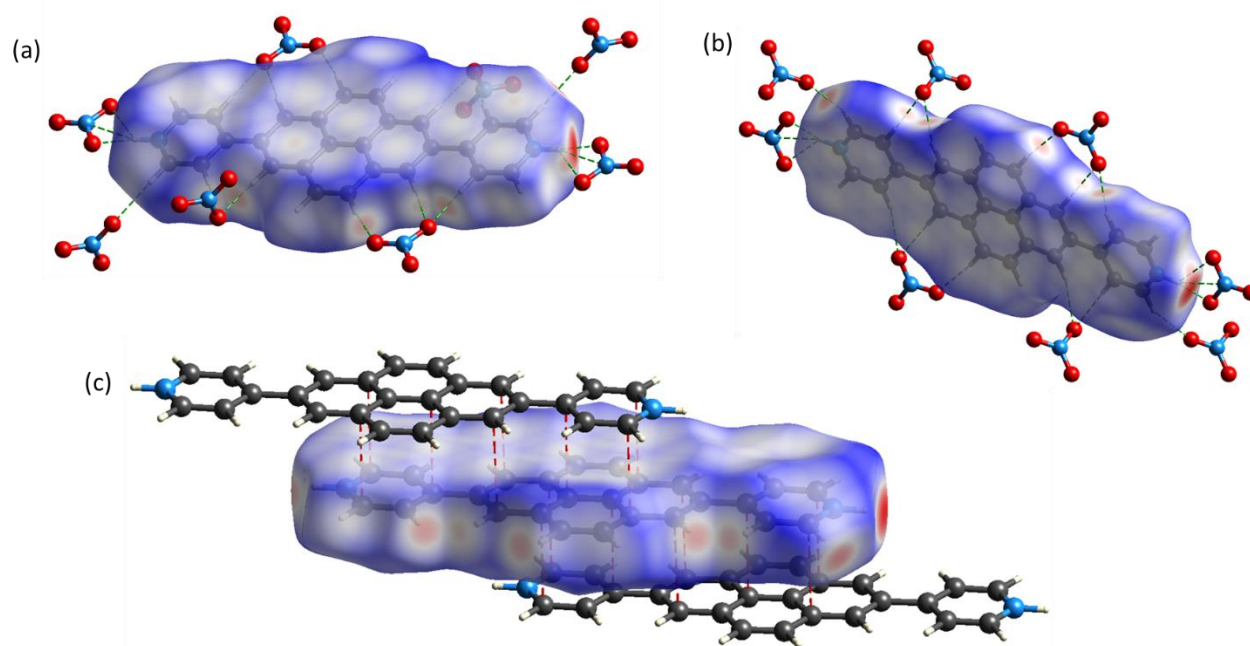

Figure S24: Hirshfeld surface for **2H**. The N-H $\cdots$ O and weak C-H $\cdots$ O hydrogen bonds are shown in (a) and (b), while the  $\pi$ -stacking interactions are shown in (c). Red areas indicate strong interactions, white areas moderate interactions and blue areas no significant interactions. Atom colour: black: carbon, red: oxygen, blue: nitrogen, and white: hydrogen.



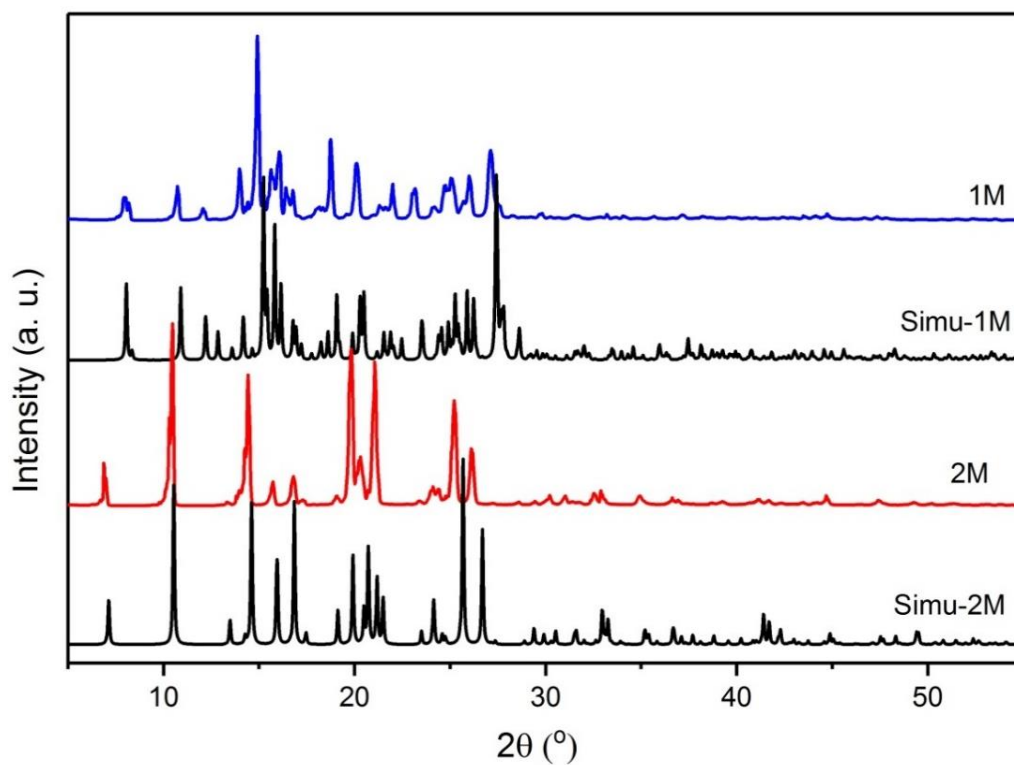

Figure S25: Simulated and experimentally observed powder X-ray diffraction patterns of **1M** and **2M**. Small systematic shifts between observed and calculated reflection positions are attributed to effects of sample preparation.

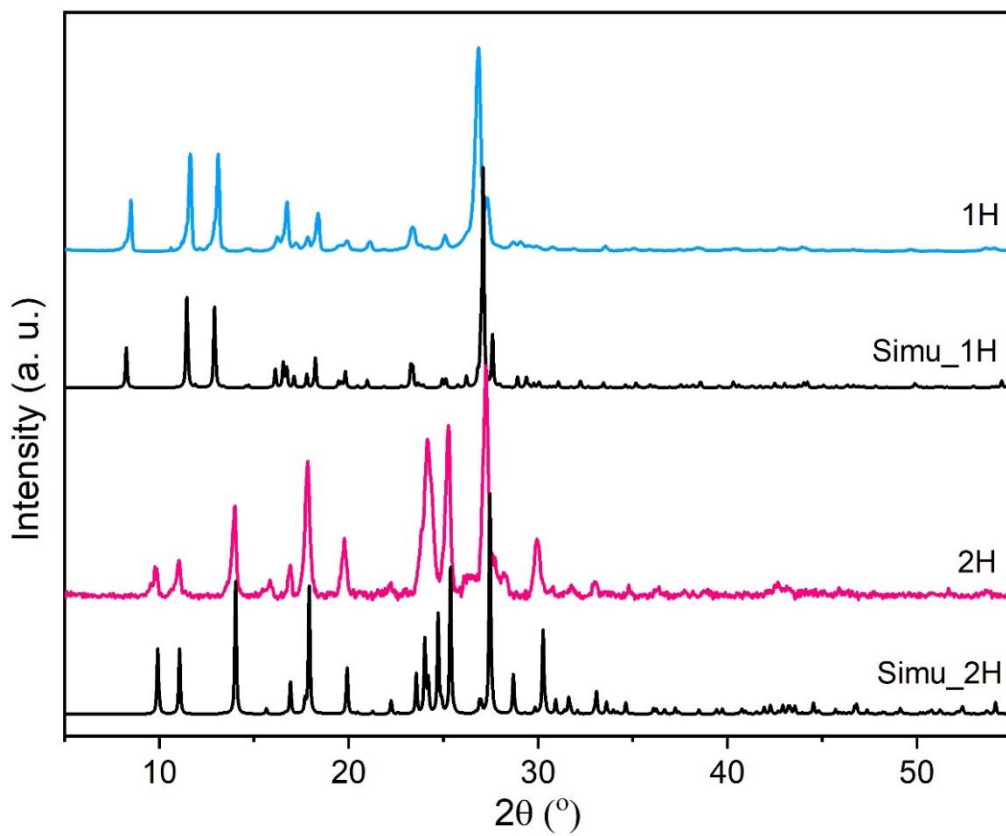

Figure S26: Simulated and experimentally observed powder X-ray diffraction patterns of **1H** and **2H**.

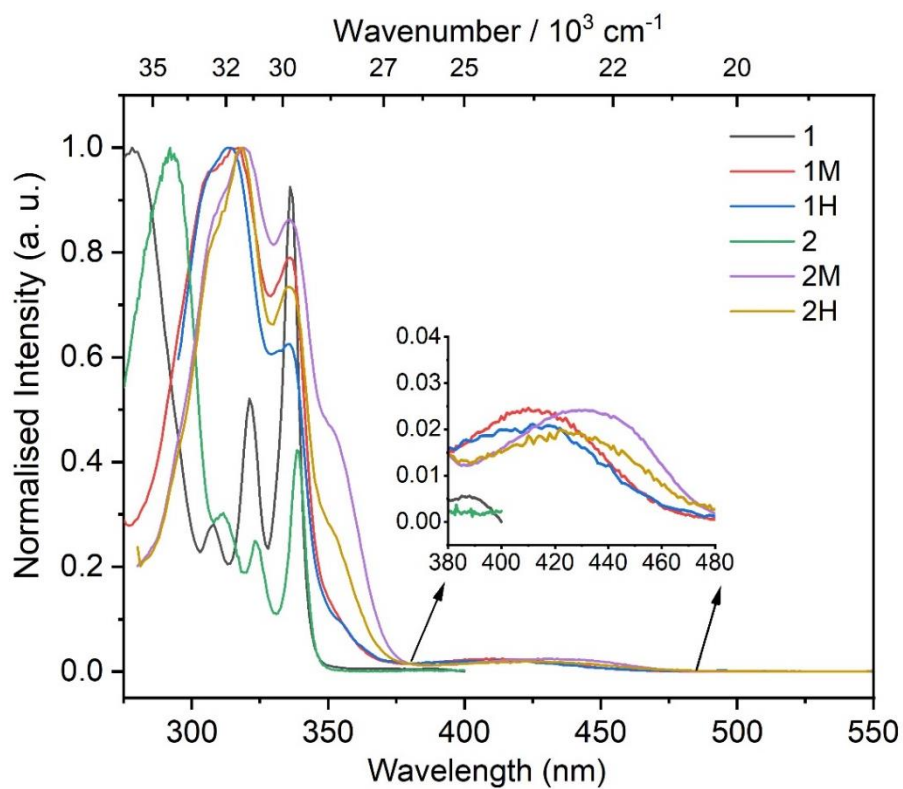

Figure S27: Normalised excitation spectra of **1**, **1M**, **1H**, **2**, **2M**, and **2H**.

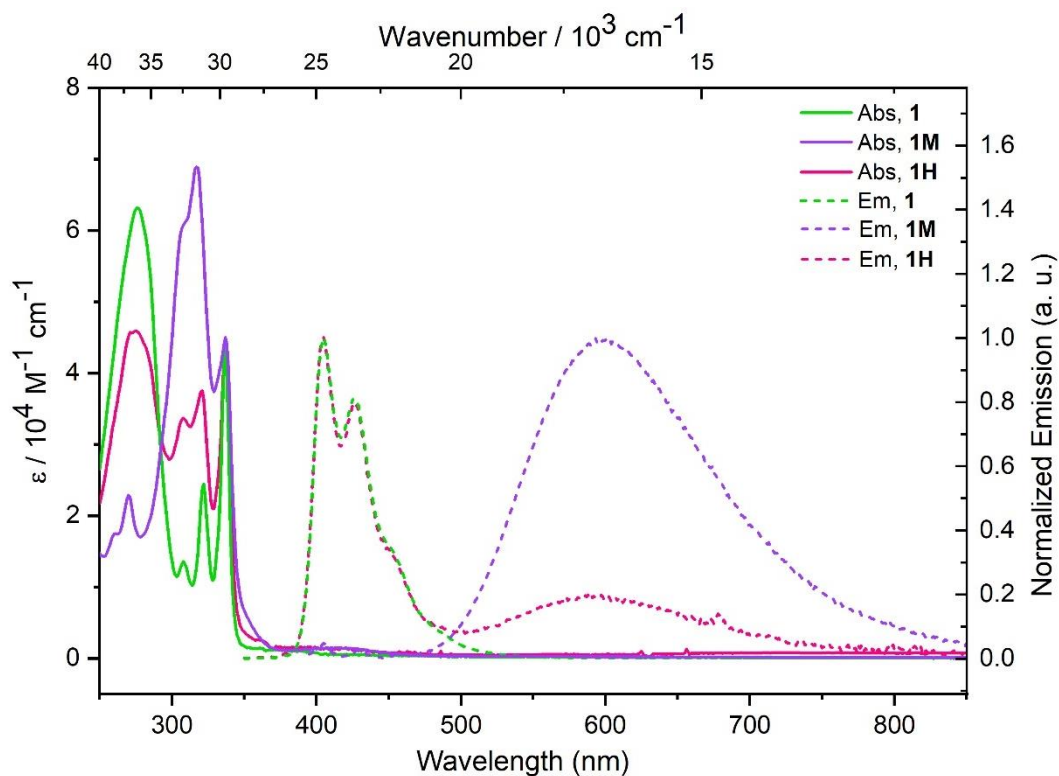

Figure S28: The absorption (solid lines) and emission (dashed lines) of **1H** (in MeCN) are compared with that of **1** and **1M**. This shows that the salt remains in equilibrium between protonated and neutral forms in solution.

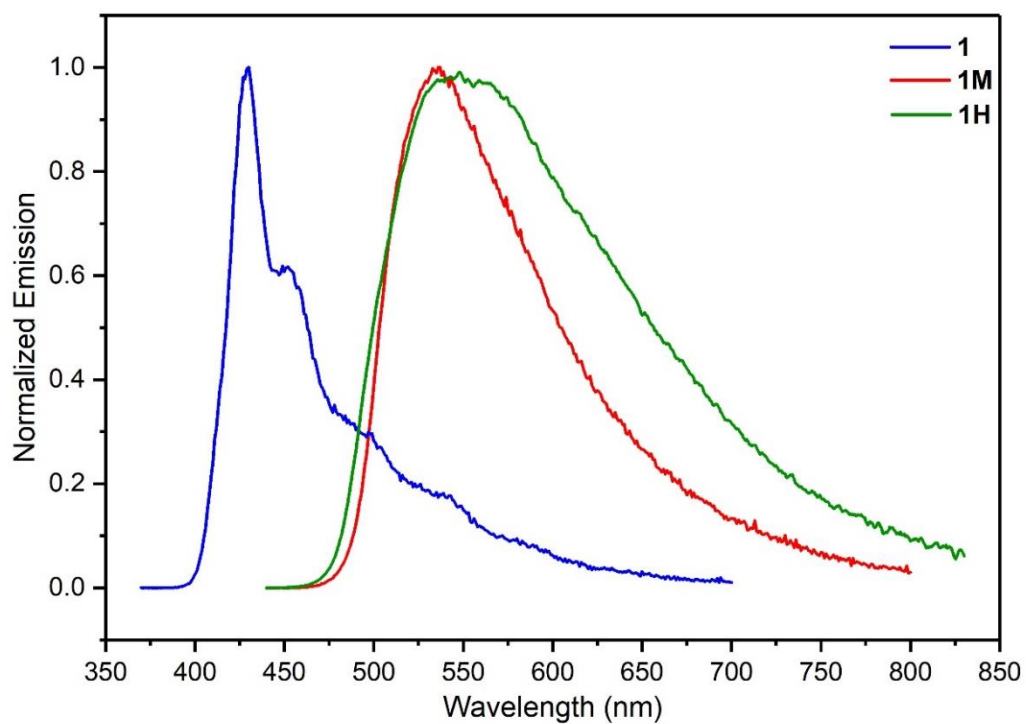

Figure S29: Solid state emission of **1**, **1M**, and **1H**. The emission of both **1M** and **1H** are bathochromically shifted compared to that of **1**.

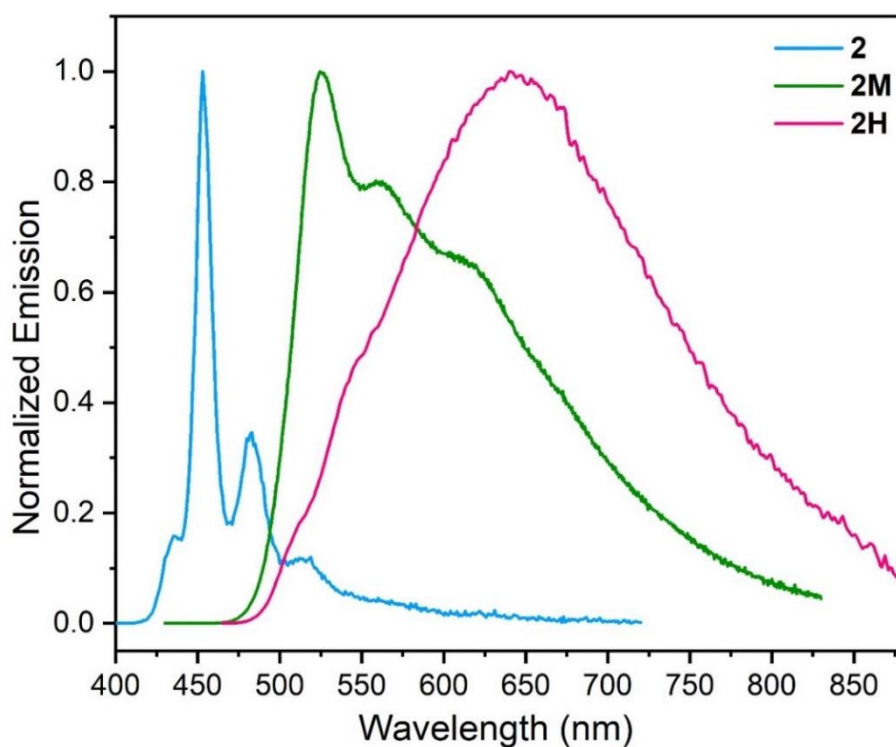

Figure S30: Solid state emission of **2**, **2M**, and **2H**. The emission of both **2M** and **2H** are bathochromically shifted compared to that of **2**.

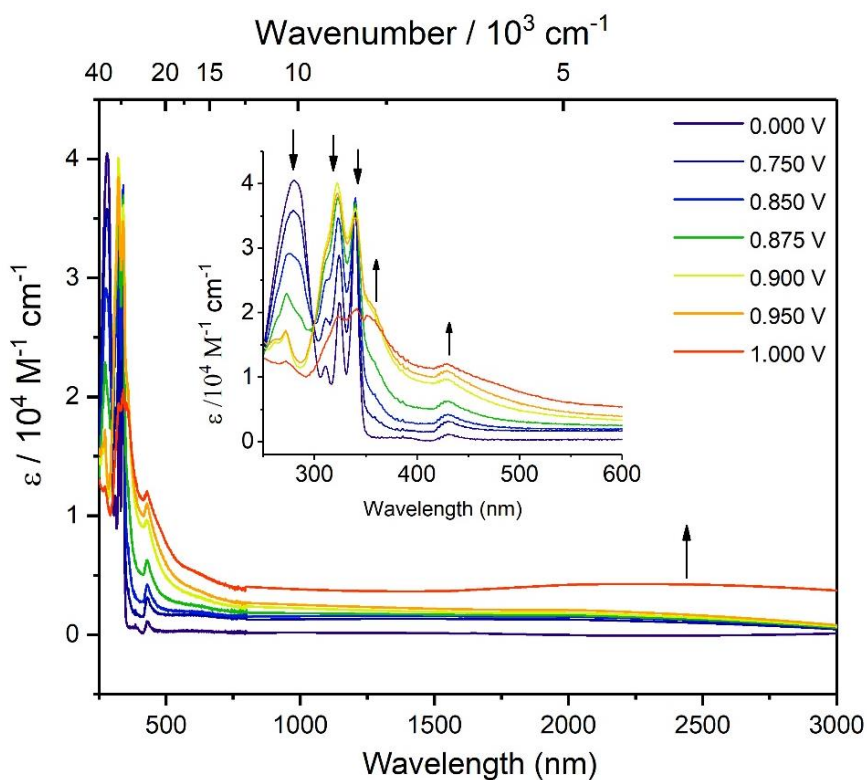

Figure S31: Spectroelectrochemical measurements of the stepwise oxidation process of **1** in DCM/0.1M [n-Bu<sub>4</sub>N][PF<sub>6</sub>]. The changes of transition intensities are shown with upward and downward arrows. A broad band in the NIR region can be observed.

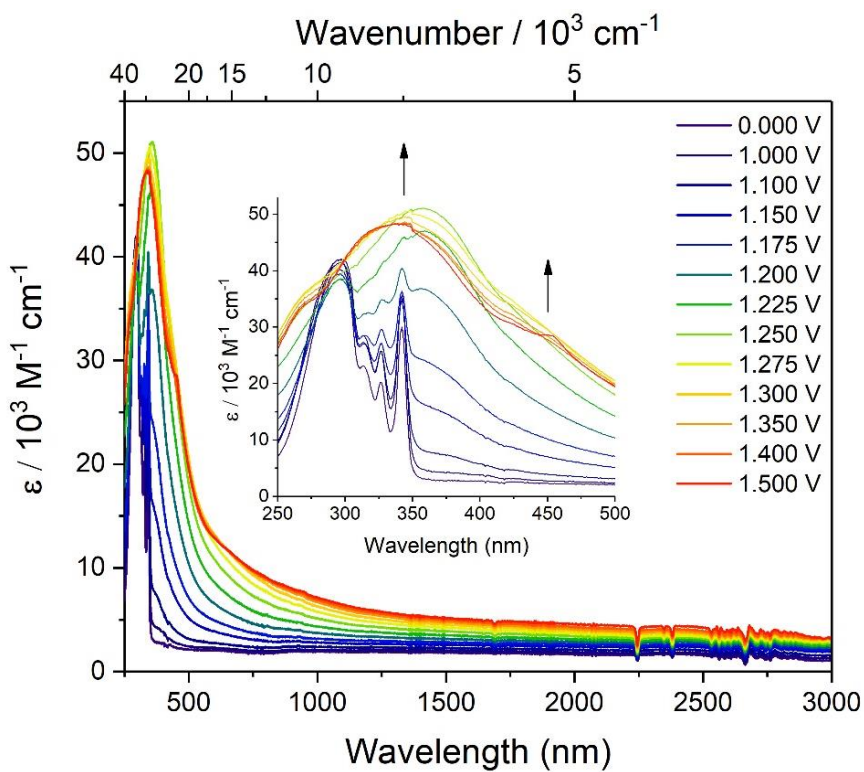

Figure S32: Spectroelectrochemical measurements of the stepwise oxidation process of **2** in DCM/0.1M [n-Bu<sub>4</sub>N][PF<sub>6</sub>]. A very broad band with tail extended into the visible region can be observed.

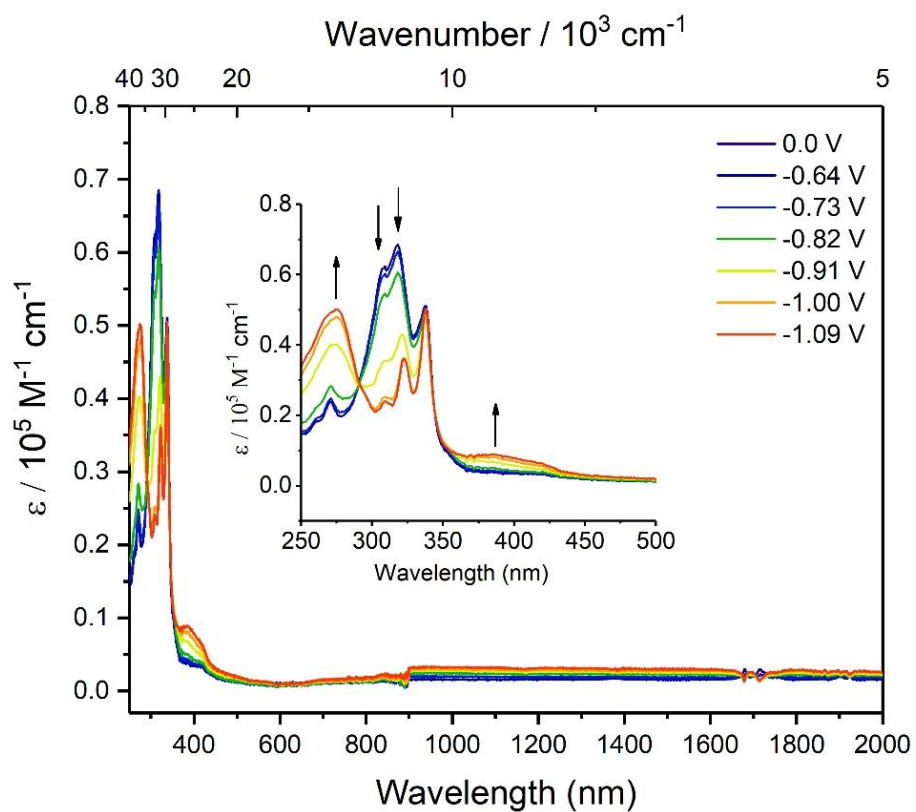

Figure S33: Spectroelectrochemical measurements of the stepwise reduction process of **1M** in MeCN/0.1M [n-Bu<sub>4</sub>N][PF<sub>6</sub>]. The changes of transition intensities are shown with upward and downward arrows. No absorption in the NIR region was observed.

**Table S2.** Comparison of selected experimentally determined and theoretically optimized structural parameters (PBE0-GD3BJ/LANL2DZP in THF) for compounds **1**, **1H**, and **1M**.

|                                                                                   |                  | <b>1</b> <sup>[1]</sup> |          | <b>1H</b> |          | <b>1M</b>         |                   |          |      |
|-----------------------------------------------------------------------------------|------------------|-------------------------|----------|-----------|----------|-------------------|-------------------|----------|------|
|                                                                                   |                  | Exp.                    | Opt.     | Exp.      | Opt.     | Exp. <sup>a</sup> | Exp. <sup>a</sup> | Opt.     |      |
| 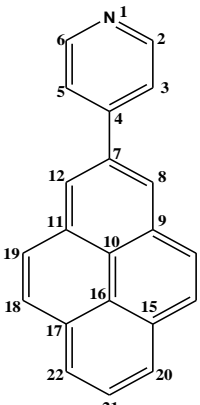 | Bond lengths (Å) | C3-C4                   | 1.397(2) | 1.40      | 1.395(3) | 1.41              | 1.398(3)          | 1.403(3) | 1.41 |
|                                                                                   |                  | C4-C5                   | 1.396(2) | 1.40      | 1.395(3) | 1.41              | 1.399(3)          | 1.401(3) | 1.41 |
|                                                                                   |                  | C4-C7                   | 1.489(2) | 1.48      | 1.482(3) | 1.47              | 1.486(3)          | 1.485(3) | 1.47 |
|                                                                                   |                  | C7-C8                   | 1.398(2) | 1.40      | 1.398(3) | 1.40              | 1.401(3)          | 1.402(3) | 1.40 |
|                                                                                   |                  | C7-C12                  | 1.398(2) | 1.40      | 1.401(3) | 1.40              | 1.404(3)          | 1.396(3) | 1.40 |
| Bond angles (°)                                                                   | C3-C4-C7         | 120.89(12)              | 121.68   | 121.9(2)  | 121.36   | 122.9(2)          | 121.2(2)          | 121.70   |      |
|                                                                                   | C4-C7-C8         | 121.26(12)              | 120.37   | 120.0(2)  | 120.13   | 121.0(2)          | 119.8(2)          | 120.17   |      |
|                                                                                   | C5-C4-C7         | 122.12(12)              | 121.68   | 121.6(2)  | 121.36   | 120.7(2)          | 121.7(2)          | 121.80   |      |
|                                                                                   | C4-C7-C12        | 118.95(12)              | 120.37   | 121.3(2)  | 120.13   | 119.6(2)          | 120.7(2)          | 120.17   |      |
| Torsion angles (°)                                                                | C3-C4-C7-C8      | 35.48                   | 33.73    | 1.40      | 29.58    | -17.65            | -21.06            | 28.14    |      |
|                                                                                   | C5-C4-C7-C12     | 35.23                   | 33.73    | 1.37      | 29.58    | -17.74            | -21.07            | 28.32    |      |

<sup>a</sup> There are two symmetry-independent molecules in the asymmetric unit.

**Table S3.** Comparison of selected experimentally determined and theoretically optimized structural parameters (PBE0-GD3BJ/LANL2DZP in THF) for compounds **2**, **2H**, and **2M**.

|                                                                                     |                  | <b>2</b> <sup>[1]</sup> |                   |          | <b>2H</b> |            | <b>2M</b>  |          |      |
|-------------------------------------------------------------------------------------|------------------|-------------------------|-------------------|----------|-----------|------------|------------|----------|------|
|                                                                                     |                  | Exp. <sup>a</sup>       | Exp. <sup>β</sup> | Opt.     | Exp.      | Opt.       | Exp.       | Opt.     |      |
| 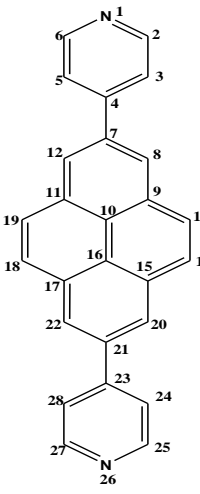 | Bond lengths (Å) | C3-C4                   | 1.394(2)          | 1.391(2) | 1.40      | 1.399(4)   | 1.41       | 1.396(2) | 1.41 |
|                                                                                     |                  | C4-C5                   | 1.395(2)          | 1.389(2) | 1.40      | 1.404(3)   | 1.41       | 1.396(2) | 1.41 |
|                                                                                     |                  | C4-C7                   | 1.491(2)          | 1.482(2) | 1.48      | 1.491(3)   | 1.47       | 1.489(3) | 1.47 |
|                                                                                     |                  | C7-C8                   | 1.401(2)          | 1.397(2) | 1.40      | 1.401(3)   | 1.40       | 1.399(2) | 1.40 |
|                                                                                     |                  | C7-C12                  | 1.397(2)          | 1.396(2) | 1.40      | 1.397(3)   | 1.40       | 1.399(2) | 1.40 |
|                                                                                     |                  | C20-C21                 | 1.397(2)          | 1.396(2) | 1.40      | 1.397(3)   | 1.40       | 1.399(2) | 1.40 |
|                                                                                     |                  | C21-C22                 | 1.401(2)          | 1.397(2) | 1.40      | 1.401(3)   | 1.40       | 1.399(2) | 1.40 |
|                                                                                     |                  | C21-C23                 | 1.491(2)          | 1.482(2) | 1.48      | 1.491(3)   | 1.47       | 1.489(3) | 1.47 |
|                                                                                     |                  | C23-C24                 | 1.395(2)          | 1.389(2) | 1.40      | 1.404(3)   | 1.41       | 1.396(2) | 1.41 |
| C23-C28                                                                             | 1.394(2)         | 1.391(2)                | 1.40              | 1.399(4) | 1.41      | 1.396(2)   | 1.41       |          |      |
| Bond angles (°)                                                                     | C3-C4-C7         | 121.56(13)              | 121.90(15)        | 121.63   | 122.0(2)  | 121.22     | 121.59(11) | 122.02   |      |
|                                                                                     | C4-C7-C8         | 120.39(13)              | 120.63(15)        | 120.31   | 120.6(2)  | 120.07     | 120.55(11) | 120.49   |      |
|                                                                                     | C5-C4-C7         | 122.48(13)              | 121.52(15)        | 121.63   | 121.1(2)  | 121.22     | 121.59(11) | 122.02   |      |
|                                                                                     | C4-C7-C12        | 121.03(13)              | 120.40(14)        | 120.31   | 120.0(2)  | 120.07     | 120.55(11) | 120.49   |      |
|                                                                                     | C20-C21-C23      | 121.03(13)              | 120.40(14)        | 120.31   | 120.0(2)  | 120.07     | 120.55(11) | 120.49   |      |
|                                                                                     | C21-C23-C24      | 122.48(13)              | 121.52(15)        | 121.63   | 121.1(2)  | 121.22     | 121.59(11) | 122.02   |      |
|                                                                                     | C22-C21-C23      | 120.39(13)              | 120.63(15)        | 120.31   | 120.6(2)  | 120.07     | 120.55(11) | 120.49   |      |
| C21-C23-C28                                                                         | 121.56(13)       | 121.90(15)              | 121.63            | 122.0(2) | 121.22    | 121.59(11) | 122.02     |          |      |
| Torsion angles (°)                                                                  | C3-C4-C7-C8      | -12.49                  | -37.76            | 32.67    | -0.96     | 28.83      | 0.53       | 0.00     |      |
|                                                                                     | C5-C4-C7-C12     | -12.32                  | -37.06            | 32.67    | -1.25     | 28.83      | -0.53      | 0.00     |      |
|                                                                                     | C20-C21-C23-C24  | 12.32                   | 37.06             | 32.67    | 1.25      | -28.83     | 0.53       | 0.00     |      |
|                                                                                     | C22-C21-C23-C28  | 12.49                   | 37.76             | -32.67   | 0.96      | -28.83     | -0.53      | 0.00     |      |

There are two polymorphs of **2** –  $\alpha$  and  $\beta$ .

**Table S4.** Coordinates of the optimized geometries of compounds **1**, **2**, **1M**, **2M**, **1H**, and **2H**.

| <b>1</b>  |         |         |           | <b>2</b>  |         |         |           |
|-----------|---------|---------|-----------|-----------|---------|---------|-----------|
| 1 N1      | -6.0672 | -0.0000 | 0.0000 N  | 1 N1      | 1.9444  | -4.9908 | 5.7435 N  |
| 2 C2      | -1.0389 | -1.2074 | -0.0852 C | 2 C2      | 1.4371  | -5.4180 | 4.5779 C  |
| 3 H3      | -1.5793 | -2.1496 | -0.1783 H | 3 H3      | 1.3069  | -6.4860 | 4.4792 H  |
| 4 C4      | -1.7482 | 0.0000  | -0.0000 C | 4 C4      | 1.0758  | -4.5744 | 3.5262 C  |
| 5 C5      | -1.0389 | 1.2074  | 0.0852 C  | 5 H5      | 0.6521  | -4.9952 | 2.6288 H  |
| 6 H6      | -1.5792 | 2.1496  | 0.1783 H  | 6 C6      | 1.2419  | -3.1876 | 3.6684 C  |
| 7 C7      | 0.3635  | 1.2285  | 0.0911 C  | 7 C7      | 1.7725  | -2.7366 | 4.8874 C  |
| 8 C8      | 1.1056  | 2.4578  | 0.1914 C  | 8 H8      | 1.9517  | -1.6882 | 5.0625 H  |
| 9 H9      | 0.5525  | 3.3947  | 0.2649 H  | 9 C9      | 2.1018  | -3.6656 | 5.8756 C  |
| 10 C10    | 4.6228  | 1.2107  | 0.0951 C  | 10 H10    | 2.5163  | -3.3275 | 6.8144 H  |
| 11 H11    | 5.1708  | 2.1503  | 0.1690 H  | 11 C11    | 0.8757  | -2.2476 | 2.5866 C  |
| 12 C12    | 3.2174  | 1.2312  | 0.0965 C  | 12 C12    | 0.3932  | -0.9665 | 2.8947 C  |
| 13 C13    | 2.4712  | 2.4580  | 0.1931 C  | 13 H13    | 0.2644  | -0.6738 | 3.9255 H  |
| 14 H14    | 3.0225  | 3.3959  | 0.2684 H  | 14 C14    | 0.0376  | -0.0623 | 1.8836 C  |
| 15 C15    | 5.3153  | -0.0000 | 0.0000 C  | 15 C15    | 0.1760  | -0.4519 | 0.5200 C  |
| 16 H16    | 6.4051  | -0.0000 | 0.0000 H  | 16 C16    | 0.6687  | -1.7507 | 0.2028 C  |
| 17 C17    | 4.6228  | -1.2107 | -0.0951 C | 17 C17    | 1.0074  | -2.6286 | 1.2425 C  |
| 18 H18    | 5.1708  | -2.1503 | -0.1690 H | 18 H18    | 1.4016  | -3.6025 | 0.9957 H  |
| 19 C19    | 3.2174  | -1.2312 | -0.0965 C | 19 C19    | 0.8087  | -2.1194 | -1.1819 C |
| 20 C20    | 2.4712  | -2.4580 | -0.1931 C | 20 H20    | 1.1872  | -3.1024 | -1.4172 H |
| 21 H21    | 3.0225  | -3.3959 | -0.2684 H | 21 C21    | 0.4706  | -1.2517 | -2.1805 C |
| 22 C22    | 1.1056  | -2.4578 | -0.1914 C | 22 H22    | 0.5786  | -1.5403 | -3.2149 H |
| 23 H23    | 0.5525  | -3.3947 | -0.2649 H | 23 N23    | -1.9444 | 4.9908  | -5.7435 N |
| 24 C24    | 0.3635  | -1.2285 | -0.0912 C | 24 C24    | -1.4371 | 5.4180  | -4.5779 C |
| 25 C25    | 1.0806  | 0.0000  | -0.0000 C | 25 H25    | -1.3069 | 6.4860  | -4.4792 H |
| 26 C26    | 2.5045  | 0.0000  | -0.0000 C | 26 C26    | -1.0758 | 4.5744  | -3.5262 C |
| 27 C27    | -3.2276 | 0.0000  | 0.0000 C  | 27 H27    | -0.6521 | 4.9952  | -2.6288 H |
| 28 C28    | -3.9651 | -1.0378 | 0.5919 C  | 28 C28    | -1.2419 | 3.1876  | -3.6684 C |
| 29 H29    | -3.4673 | -1.8666 | 1.0932 H  | 29 C29    | -1.7725 | 2.7366  | -4.8874 C |
| 30 C30    | -5.3600 | -0.9892 | 0.5649 C  | 30 H30    | -1.9517 | 1.6882  | -5.0625 H |
| 31 H31    | -5.9390 | -1.7900 | 1.0293 H  | 31 C31    | -2.1018 | 3.6656  | -5.8756 C |
| 32 C32    | -5.3600 | 0.9891  | -0.5649 C | 32 H32    | -2.5163 | 3.3275  | -6.8144 H |
| 33 H33    | -5.9390 | 1.7900  | -1.0293 H | 33 C33    | -0.8757 | 2.2476  | -2.5866 C |
| 34 C34    | -3.9651 | 1.0378  | -0.5919 C | 34 C34    | -0.3932 | 0.9665  | -2.8947 C |
| 35 H35    | -3.4673 | 1.8666  | -1.0932 H | 35 H35    | -0.2644 | 0.6738  | -3.9255 H |
|           |         |         |           | 36 C36    | -0.0376 | 0.0623  | -1.8836 C |
|           |         |         |           | 37 C37    | -0.1760 | 0.4519  | -0.5200 C |
|           |         |         |           | 38 C38    | -0.6687 | 1.7507  | -0.2028 C |
|           |         |         |           | 39 C39    | -1.0074 | 2.6286  | -1.2425 C |
|           |         |         |           | 40 H40    | -1.4016 | 3.6025  | -0.9957 H |
|           |         |         |           | 41 C41    | -0.8087 | 2.1194  | 1.1819 C  |
|           |         |         |           | 42 H42    | -1.1872 | 3.1024  | 1.4172 H  |
|           |         |         |           | 43 C43    | -0.4706 | 1.2517  | 2.1805 C  |
|           |         |         |           | 44 H44    | -0.5786 | 1.5403  | 3.2149 H  |
| <b>1M</b> |         |         |           | <b>2M</b> |         |         |           |
| 1 N1      | 5.5741  | 0.0063  | -0.0079 N | 1 N1      | -4.7181 | 0.0002  | 6.1969 N  |
| 2 C2      | 0.6017  | -1.2120 | 0.0633 C  | 2 C2      | -3.9760 | -1.0926 | 5.9172 C  |
| 3 H3      | 1.1370  | -2.1568 | 0.1519 H  | 3 H3      | -4.0769 | -1.9279 | 6.5868 H  |
| 4 C4      | 1.3072  | 0.0007  | -0.0099 C | 4 C4      | -3.1252 | -1.1171 | 4.8288 C  |
| 5 C5      | 0.6004  | 1.2128  | -0.0814 C | 5 H5      | -2.5355 | -2.0017 | 4.6666 H  |
| 6 H6      | 1.1345  | 2.1580  | -0.1725 H | 6 C6      | -3.0179 | 0.0038  | 3.9849 C  |
| 7 C7      | -0.8002 | 1.2314  | -0.0879 C | 7 C7      | -2.1250 | 0.0042  | 2.8153 C  |
| 8 C8      | -1.5414 | 2.4618  | -0.1779 C | 8 C8      | -1.8513 | -1.1972 | 2.1417 C  |
| 9 H9      | -0.9896 | 3.3995  | -0.2468 H | 9 H9      | -2.3124 | -2.1183 | 2.4610 H  |

|           |         |         |           |           |         |         |           |
|-----------|---------|---------|-----------|-----------|---------|---------|-----------|
| 10 C10    | -2.9065 | 2.4596  | -0.1746 C | 10 C10    | -1.0166 | -1.2163 | 1.0173 C  |
| 11 H11    | -3.4591 | 3.3971  | -0.2412 H | 11 C11    | -0.4276 | 0.0009  | 0.5674 C  |
| 12 C12    | -5.0553 | 1.2103  | -0.0773 C | 12 C12    | -0.7405 | -2.4330 | 0.2994 C  |
| 13 H13    | -5.6044 | 2.1498  | -0.1421 H | 13 H13    | -1.1968 | -3.3488 | 0.6418 H  |
| 14 C14    | -3.6504 | 1.2313  | -0.0838 C | 14 N14    | 4.7181  | -0.0002 | -6.1969 N |
| 15 C15    | -5.7465 | -0.0014 | 0.0114 C  | 15 C15    | 4.6412  | -1.0954 | -5.4083 C |
| 16 H16    | -6.8361 | -0.0016 | 0.0156 H  | 16 H16    | 5.2665  | -1.9277 | -5.6793 H |
| 17 C17    | -5.0540 | -1.2128 | 0.0948 C  | 17 C17    | 3.8071  | -1.1245 | -4.3091 C |
| 18 H18    | -5.6022 | -2.1525 | 0.1638 H  | 18 H18    | 3.8016  | -2.0108 | -3.6999 H |
| 19 C19    | -3.6492 | -1.2331 | 0.0909 C  | 19 C19    | 3.0179  | -0.0038 | -3.9849 C |
| 20 C20    | -2.9039 | -2.4610 | 0.1761 C  | 20 C20    | 2.1250  | -0.0042 | -2.8153 C |
| 21 H21    | -3.4554 | -3.3989 | 0.2464 H  | 21 C21    | 1.5493  | -1.2042 | -2.3671 C |
| 22 C22    | -1.5388 | -2.4625 | 0.1704 C  | 22 H22    | 1.7274  | -2.1267 | -2.8970 H |
| 23 H23    | -0.9861 | -3.3998 | 0.2355 H  | 23 C23    | 0.6963  | -1.2195 | -1.2560 C |
| 24 C24    | -0.7988 | -1.2316 | 0.0762 C  | 24 C24    | 0.4276  | -0.0009 | -0.5674 C |
| 25 C25    | -1.5148 | -0.0003 | -0.0037 C | 25 C25    | 0.0809  | -2.4346 | -0.7900 C |
| 26 C26    | -2.9375 | -0.0007 | 0.0010 C  | 26 H26    | 0.2836  | -3.3517 | -1.3207 H |
| 27 C27    | 2.7765  | 0.0017  | -0.0087 C | 27 C27    | 3.9760  | 1.0926  | -5.9172 C |
| 28 C28    | 3.5199  | -1.0850 | -0.5112 C | 28 H28    | 4.0769  | 1.9279  | -6.5868 H |
| 29 H29    | 3.0333  | -1.9538 | -0.9464 H | 29 C29    | 3.1252  | 1.1171  | -4.8288 C |
| 30 C30    | 4.9002  | -1.0574 | -0.4983 C | 30 H30    | 2.5355  | 2.0017  | -4.6666 H |
| 31 H31    | 5.5007  | -1.8758 | -0.8860 H | 31 C31    | 1.8513  | 1.1972  | -2.1417 C |
| 32 C32    | 4.8961  | 1.0665  | 0.4840 C  | 32 H32    | 2.3124  | 2.1183  | -2.4610 H |
| 33 H33    | 5.4944  | 1.8848  | 0.8749 H  | 33 C33    | 1.0166  | 1.2163  | -1.0173 C |
| 34 C34    | 3.5158  | 1.0906  | 0.4948 C  | 34 C34    | 0.7405  | 2.4330  | -0.2994 C |
| 35 H35    | 3.0263  | 1.9600  | 0.9253 H  | 35 H35    | 1.1968  | 3.3488  | -0.6418 H |
| 36 C36    | 7.0429  | -0.0108 | 0.0398 C  | 36 C36    | -4.6412 | 1.0954  | 5.4083 C  |
| 37 H37    | 7.4170  | 1.0123  | -0.0421 H | 37 H37    | -5.2665 | 1.9277  | 5.6793 H  |
| 38 H38    | 7.3685  | -0.4523 | 0.9873 H  | 38 C38    | -3.8071 | 1.1245  | 4.3091 C  |
| 39 H39    | 7.4235  | -0.6027 | -0.7958 H | 39 H39    | -3.8016 | 2.0108  | 3.6999 H  |
|           |         |         |           | 40 C40    | -1.5493 | 1.2042  | 2.3671 C  |
|           |         |         |           | 41 H41    | -1.7274 | 2.1267  | 2.8970 H  |
|           |         |         |           | 42 C42    | -0.6963 | 1.2195  | 1.2560 C  |
|           |         |         |           | 43 C43    | -0.0809 | 2.4346  | 0.7900 C  |
|           |         |         |           | 44 H44    | -0.2836 | 3.3517  | 1.3207 H  |
|           |         |         |           | 45 C45    | -5.6478 | -0.0058 | 7.3360 C  |
|           |         |         |           | 46 H46    | -5.5818 | 0.9378  | 7.8582 H  |
|           |         |         |           | 47 H47    | -6.6562 | -0.1565 | 6.9736 H  |
|           |         |         |           | 48 H48    | -5.3803 | -0.8046 | 8.0107 H  |
|           |         |         |           | 49 C49    | 5.6478  | 0.0058  | -7.3360 C |
|           |         |         |           | 50 H50    | 6.6562  | 0.1565  | -6.9736 H |
|           |         |         |           | 51 H51    | 5.5818  | -0.9378 | -7.8582 H |
|           |         |         |           | 52 H52    | 5.3803  | 0.8046  | -8.0107 H |
| <b>1H</b> |         |         |           | <b>2H</b> |         |         |           |
| 1 N1      | 5.9389  | -0.0000 | -0.0000 N | 1 N1      | -7.7602 | -0.0001 | 0.0000 N  |
| 2 C2      | 0.9978  | 1.2130  | -0.0725 C | 2 H2      | -8.7682 | -0.0002 | 0.0001 H  |
| 3 H3      | 1.5330  | 2.1577  | -0.1631 H | 3 C3      | -2.8233 | 1.2066  | -0.1466 C |
| 4 C4      | 1.7033  | 0.0000  | 0.0000 C  | 4 H4      | -3.3546 | 2.1338  | -0.2910 H |
| 5 C5      | 0.9979  | -1.2129 | 0.0725 C  | 5 C5      | -3.5271 | 0.0001  | -0.0000 C |
| 6 H6      | 1.5330  | -2.1577 | 0.1631 H  | 6 C6      | -2.8233 | -1.2065 | 0.1465 C  |
| 7 C7      | -0.4026 | -1.2315 | 0.0850 C  | 7 H7      | -3.3547 | -2.1336 | 0.2909 H  |
| 8 C8      | -1.1432 | -2.4618 | 0.1828 C  | 8 C8      | -1.4230 | -1.2244 | 0.1564 C  |
| 9 H9      | -0.5908 | -3.3990 | 0.2532 H  | 9 C9      | -0.7104 | 0.0000  | -0.0000 C |
| 10 C10    | -2.5082 | -2.4597 | 0.1858 C  | 10 C10    | -1.4230 | 1.2245  | -0.1564 C |
| 11 H11    | -3.0604 | -3.3969 | 0.2593 H  | 11 C11    | -4.9984 | 0.0001  | -0.0000 C |
| 12 C12    | -4.6574 | -1.2112 | 0.0919 C  | 12 C12    | 0.6822  | 2.4476  | -0.3225 C |



|        |         |         |           |        |         |         |           |
|--------|---------|---------|-----------|--------|---------|---------|-----------|
| 13 H13 | -5.2061 | -2.1504 | 0.1635 H  | 13 H13 | 1.2286  | 3.3697  | -0.4454 H |
| 14 C14 | -3.2526 | -1.2318 | 0.0928 C  | 14 C14 | -0.6821 | 2.4476  | -0.3225 C |
| 15 C15 | -5.3493 | -0.0000 | 0.0000 C  | 15 H15 | -1.2285 | 3.3697  | -0.4454 H |
| 16 H16 | -6.4389 | -0.0000 | 0.0000 H  | 16 C16 | -5.7294 | 1.1188  | 0.4500 C  |
| 17 C17 | -4.6575 | 1.2112  | -0.0919 C | 17 H17 | -5.2355 | 1.9943  | 0.8312 H  |
| 18 H18 | -5.2061 | 2.1503  | -0.1635 H | 18 C18 | -7.1096 | 1.0965  | 0.4405 C  |
| 19 C19 | -3.2526 | 1.2318  | -0.0928 C | 19 H19 | -7.7169 | 1.9163  | 0.7785 H  |
| 20 C20 | -2.5082 | 2.4596  | -0.1858 C | 20 C20 | -7.1096 | -1.0966 | -0.4404 C |
| 21 H21 | -3.0604 | 3.3969  | -0.2593 H | 21 H21 | -7.7167 | -1.9165 | -0.7785 H |
| 22 C22 | -1.1432 | 2.4618  | -0.1828 C | 22 C22 | -5.7293 | -1.1187 | -0.4500 C |
| 23 H23 | -0.5909 | 3.3990  | -0.2532 H | 23 H23 | -5.2354 | -1.9942 | -0.8313 H |
| 24 C24 | -0.4026 | 1.2315  | -0.0850 C | 24 N24 | 7.7602  | 0.0001  | -0.0000 N |
| 25 C25 | -1.1177 | 0.0000  | 0.0000 C  | 25 H25 | 8.7682  | 0.0001  | -0.0001 H |
| 26 C26 | -2.5404 | -0.0000 | 0.0000 C  | 26 C26 | 2.8233  | -1.2066 | 0.1466 C  |
| 27 C27 | 3.1722  | 0.0000  | -0.0000 C | 27 H27 | 3.3546  | -2.1338 | 0.2910 H  |
| 28 C28 | 3.9067  | 1.0817  | 0.5314 C  | 28 C28 | 3.5271  | -0.0001 | 0.0000 C  |
| 29 H29 | 3.4099  | 1.9359  | 0.9829 H  | 29 C29 | 2.8233  | 1.2065  | -0.1465 C |
| 30 C30 | 5.2869  | 1.0596  | 0.5222 C  | 30 H30 | 3.3547  | 2.1336  | -0.2909 H |
| 31 H31 | 5.8998  | 1.8595  | 0.9280 H  | 31 C31 | 1.4230  | 1.2245  | -0.1564 C |
| 32 C32 | 5.2869  | -1.0596 | -0.5222 C | 32 C32 | 0.7104  | -0.0000 | 0.0000 C  |
| 33 H33 | 5.8998  | -1.8595 | -0.9280 H | 33 C33 | 1.4230  | -1.2245 | 0.1564 C  |
| 34 C34 | 3.9067  | -1.0817 | -0.5314 C | 34 C34 | 4.9984  | -0.0001 | 0.0000 C  |
| 35 H35 | 3.4098  | -1.9358 | -0.9828 H | 35 C35 | -0.6822 | -2.4476 | 0.3225 C  |
| 36 H36 | 6.9569  | -0.0000 | 0.0000 H  | 36 H36 | -1.2286 | -3.3697 | 0.4454 H  |
|        |         |         |           | 37 C37 | 0.6821  | -2.4476 | 0.3225 C  |
|        |         |         |           | 38 H38 | 1.2285  | -3.3697 | 0.4454 H  |
|        |         |         |           | 39 C39 | 5.7294  | -1.1188 | -0.4500 C |
|        |         |         |           | 40 H40 | 5.2355  | -1.9943 | -0.8312 H |
|        |         |         |           | 41 C41 | 7.1096  | -1.0965 | -0.4405 C |
|        |         |         |           | 42 H42 | 7.7169  | -1.9163 | -0.7785 H |
|        |         |         |           | 43 C43 | 7.1096  | 1.0966  | 0.4405 C  |
|        |         |         |           | 44 H44 | 7.7168  | 1.9164  | 0.7785 H  |
|        |         |         |           | 45 C45 | 5.7293  | 1.1187  | 0.4500 C  |
|        |         |         |           | 46 H46 | 5.2354  | 1.9942  | 0.8313 H  |

**Table S5.** Absorption wavelengths ( $\lambda_{\text{cal}}$ , nm), oscillator strengths ( $f$ ), and main electronic transitions calculated at the PBE0-GD3BJ and CAM-B3LYP-GD3BJ level in THF for compounds **1**, **2**, **1M**, **2M**, **1H**, and **2H**. Corresponding excited states ( $S_n$ ) are given in brackets. Experimental wavelengths ( $\lambda_{\text{exp}}$ , nm) and their extinction coefficients ( $\epsilon$ ,  $\text{M}^{-1}\text{cm}^{-1}$ ) measured in MeCN are given for comparison.

| Compound  | $\lambda_{\text{exp}}$<br>(MeCN) | $\epsilon / \text{M}^{-1}$<br>$\text{cm}^{-1}$ |           | $\lambda_{\text{cal}}$ | $f(S_n)$                                                                               | Main electronic transitions (weight %) <sup>a</sup>                                                                                             |
|-----------|----------------------------------|------------------------------------------------|-----------|------------------------|----------------------------------------------------------------------------------------|-------------------------------------------------------------------------------------------------------------------------------------------------|
| <b>1</b>  | 362                              | 1100                                           | PBE0      | 354                    | 0.013 ( $S_1$ )                                                                        | H $\rightarrow$ L+1 (76%); H-1 $\rightarrow$ L (22%)                                                                                            |
|           | 337                              | 37000                                          |           | 339                    | 0.36 ( $S_2$ )                                                                         | H $\rightarrow$ L (90%)                                                                                                                         |
|           | 322                              | 21000                                          |           | 277                    | 1.60 ( $S_5$ )                                                                         | H-1 $\rightarrow$ L+1 (91%)                                                                                                                     |
|           | 308                              |                                                | CAM-B3LYP | 330                    | 0.007 ( $S_1$ )                                                                        | H $\rightarrow$ L+1 (58%); H-1 $\rightarrow$ L (33%)                                                                                            |
|           | 276                              |                                                |           | 321                    | 0.43 ( $S_2$ )                                                                         | H $\rightarrow$ L (90%)                                                                                                                         |
|           |                                  |                                                |           | 259                    | 1.81 ( $S_5$ )                                                                         | H-1 $\rightarrow$ L+1 (86%)                                                                                                                     |
| <b>1M</b> | 418                              | 2900                                           | PBE0      | 488                    | 0.016 ( $S_1$ )                                                                        | H $\rightarrow$ L (98%)                                                                                                                         |
|           | 337                              | 45000                                          |           | 363                    | 0.14 ( $S_2$ )                                                                         | H-1 $\rightarrow$ L (72%); H $\rightarrow$ L+1 (26%)                                                                                            |
|           | 317                              | 68500                                          |           | 338                    | 1.01 ( $S_3$ )                                                                         | H $\rightarrow$ L+1 (58%); H-1 $\rightarrow$ L (24%);<br>H $\rightarrow$ L+2 (16%)                                                              |
|           | 269                              |                                                |           | 260                    | 0.21 ( $S_{11}$ )                                                                      | H $\rightarrow$ L+3 (29%); H-3 $\rightarrow$ L (+21%);<br>H-1 $\rightarrow$ L+2 (16%); H-1 $\rightarrow$ L+1 (15%); H-2 $\rightarrow$ L+1 (14%) |
|           |                                  |                                                | CAM-B3LYP | 390                    | 0.03 ( $S_1$ )                                                                         | H $\rightarrow$ L (+87%)                                                                                                                        |
|           |                                  |                                                |           | 324                    | 0.005 ( $S_2$ )                                                                        | H $\rightarrow$ L+1 (58%); H-1 $\rightarrow$ L (35%)                                                                                            |
|           |                                  |                                                |           | 306                    | 1.94 ( $S_3$ )                                                                         | H-1 $\rightarrow$ L (54%); H $\rightarrow$ L+1 (35%)                                                                                            |
|           |                                  |                                                |           | 248                    | 0.22 ( $S_7$ )                                                                         | H $\rightarrow$ L+3 (30%); H-1 $\rightarrow$ L+1 (23%);<br>H-2 $\rightarrow$ L+1 (17%)                                                          |
| <b>1H</b> | 421                              |                                                | PBE0      | 498                    | 0.015 ( $S_1$ )                                                                        | H $\rightarrow$ L (90%)                                                                                                                         |
|           | 337                              |                                                |           | 365                    | 0.14 ( $S_2$ )                                                                         | H-1 $\rightarrow$ L (75%); H $\rightarrow$ L+1 (23%)                                                                                            |
|           | 319                              |                                                |           | 338                    | 0.83 ( $S_3$ )                                                                         | H $\rightarrow$ L+1 (58%); H $\rightarrow$ L+2 (20%);<br>H-1 $\rightarrow$ L (20%)                                                              |
|           |                                  |                                                |           | 261                    | 0.23 ( $S_{11}$ )                                                                      | H $\rightarrow$ L+3 (30%); H-1 $\rightarrow$ L+2 (18%);<br>H-2 $\rightarrow$ L+1 (18%); H-1 $\rightarrow$ L+1 (16%); H-3 $\rightarrow$ L(12%)   |
|           |                                  |                                                | CAM-B3LYP | 396                    | 0.03 ( $S_1$ )                                                                         | H $\rightarrow$ L (89%)                                                                                                                         |
|           |                                  |                                                |           | 329                    | 0.002 ( $S_2$ )                                                                        | H $\rightarrow$ L+1 (54%); H-1 $\rightarrow$ L (39%)                                                                                            |
|           |                                  |                                                |           | 306                    | 1.81 ( $S_3$ )                                                                         | H-1 $\rightarrow$ L (51%); H $\rightarrow$ L+1 (39%)                                                                                            |
|           |                                  |                                                |           | 248                    | 0.30 ( $S_8$ )                                                                         | H $\rightarrow$ L+3 (39%); H-1 $\rightarrow$ L+1 (28%);<br>H-2 $\rightarrow$ L+1 (11%)                                                          |
| <b>2</b>  | 363                              | 1400                                           | PBE0      | 370                    | 0.016 ( $S_1$ )                                                                        | H $\rightarrow$ L+1 (76%); H-1 $\rightarrow$ L (21%)                                                                                            |
|           | 339                              | 35000                                          |           | 342                    | 0.22 ( $S_2$ )                                                                         | H $\rightarrow$ L (85%); H-1 $\rightarrow$ L+1 (14%)                                                                                            |
|           | 324                              |                                                |           | 296                    | 2.57 ( $S_4$ )                                                                         | H-1 $\rightarrow$ L+1 (84%); H $\rightarrow$ L (13%)                                                                                            |
|           | 312                              |                                                | CAM-B3LYP | 342                    | 0.01 ( $S_1$ )                                                                         | H $\rightarrow$ L+1 (63%); H-1 $\rightarrow$ L (30%)                                                                                            |
|           | 291                              |                                                |           | 322                    | 0.32 ( $S_2$ )                                                                         | H $\rightarrow$ L (86%); H-1 $\rightarrow$ L+1 (11%)                                                                                            |
|           |                                  |                                                |           | 276                    | 2.08 ( $S_3$ )                                                                         | H-1 $\rightarrow$ L+1 (81%); H $\rightarrow$ L (12%)                                                                                            |
| <b>2M</b> | 437                              | 4300                                           | PBE0      | 480                    | 0.027 ( $S_1$ )                                                                        | H $\rightarrow$ L (97%)                                                                                                                         |
|           | 352                              |                                                |           | 410                    | 0.00 ( $S_2$ )                                                                         | H $\rightarrow$ L+1 (99%)                                                                                                                       |
|           | 337                              | 80000                                          |           | 366                    | 0.57 ( $S_3$ )                                                                         | H-1 $\rightarrow$ L (82%); H $\rightarrow$ L+2 (17%)                                                                                            |
|           | 320                              | 120000                                         |           | 335                    | 1.96 ( $S_4$ )                                                                         | H $\rightarrow$ L+2 (78%); H-1 $\rightarrow$ L (16%)                                                                                            |
|           |                                  |                                                |           | 236                    | 0.20 ( $S_{20}$ )                                                                      | H-5 $\rightarrow$ L (62%); H-1 $\rightarrow$ L+4 (12%);<br>H-5 $\rightarrow$ L+1 (12%)                                                          |
|           |                                  |                                                | CAM-B3LYP | 397                    | 0.04 ( $S_1$ )                                                                         | H $\rightarrow$ L (97%)                                                                                                                         |
|           |                                  |                                                |           | 332                    | 0.17 ( $S_2$ )                                                                         | H-1 $\rightarrow$ L (56%); H $\rightarrow$ L+2 (37%)                                                                                            |
|           |                                  |                                                |           | 310                    | 2.89 ( $S_4$ )                                                                         | H $\rightarrow$ L+2 (54%); H-1 $\rightarrow$ L (+34%)                                                                                           |
|           |                                  | 215                                            |           | 0.26 ( $S_{18}$ )      | H-1 $\rightarrow$ L+4 (58%); H-5 $\rightarrow$ L (18%);<br>H-5 $\rightarrow$ L+1 (12%) |                                                                                                                                                 |
| <b>2H</b> | 428                              | 1530                                           | PBE0      | 490                    | 0.028 ( $S_1$ )                                                                        | H $\rightarrow$ L (98%)                                                                                                                         |
|           | 341                              | 30500                                          |           | 416                    | 0.00 ( $S_2$ )                                                                         | H $\rightarrow$ L+1 (99%)                                                                                                                       |
|           | 321                              | 50000                                          |           | 368                    | 0.51 ( $S_3$ )                                                                         | H-1 $\rightarrow$ L (81%); H $\rightarrow$ L+2 (17%)                                                                                            |
|           |                                  |                                                |           | 335                    | 1.85 ( $S_4$ )                                                                         | H $\rightarrow$ L+2 (78%); H-1 $\rightarrow$ L (16%)                                                                                            |
|           |                                  |                                                |           | 235                    | 0.23 ( $S_{20}$ )                                                                      | H-5 $\rightarrow$ L (69%); H-6 $\rightarrow$ L+1 (11%); H-1 $\rightarrow$ L+4 (11%)                                                             |
|           |                                  |                                                | CAM-B3LYP | 403                    | 0.04 ( $S_1$ )                                                                         | H $\rightarrow$ L (89%)                                                                                                                         |
|           |                                  |                                                |           | 333                    | 0.18 ( $S_2$ )                                                                         | H-1 $\rightarrow$ L (59%); H $\rightarrow$ L+2 (34%)                                                                                            |
|           |                                  |                                                |           | 310                    | 2.67 ( $S_4$ )                                                                         | H $\rightarrow$ L+2 (60%); H-1 $\rightarrow$ L (31%)                                                                                            |
|           |                                  | 215                                            |           | 0.30 ( $S_{19}$ )      | H-1 $\rightarrow$ L+4 (61%); H-5 $\rightarrow$ L (18%);<br>H-6 $\rightarrow$ L+1 (11%) |                                                                                                                                                 |

<sup>a</sup>H = HOMO and L = LUMO.

**Table S6.** Experimentally observed absorption and emission wavelengths ( $\lambda_{\text{exp}}$ , nm) and calculated absorption (PBE0-GD3BJ and CAM-B3LYP-GD3BJ) and emission (PBE0-GD3BJ/LANL2DZP) wavelengths for compounds **1**, **2**, **1M**, and **2M** in THF and MeCN.

| Compound  | Method    | Absorption              |      |                        |      | Emission                |      |                        |      |     |
|-----------|-----------|-------------------------|------|------------------------|------|-------------------------|------|------------------------|------|-----|
|           |           | $\lambda_{\text{calc}}$ |      | $\lambda_{\text{exp}}$ |      | $\lambda_{\text{calc}}$ |      | $\lambda_{\text{exp}}$ |      |     |
|           |           | THF                     | MeCN | THF                    | MeCN | THF                     | MeCN | THF                    | MeCN |     |
| <b>1</b>  | PBE0      | 339                     | 338  | 337                    | 322  | 397                     | 400  | 427                    | 405  |     |
|           |           | 277                     | 276  |                        |      |                         |      |                        |      |     |
|           | CAM-B3LYP | 321                     | 320  | 308                    | 276  |                         |      |                        |      |     |
|           |           | 259                     | 260  |                        |      |                         |      |                        |      |     |
| <b>1M</b> | PBE0      | 363                     | 353  | 339                    | 337  | 563                     | 535  | 586                    | 599  |     |
|           |           | 336                     | 329  | 318                    | 317  |                         |      |                        |      |     |
|           |           | 260                     | 262  | 271                    | 269  |                         |      |                        |      |     |
|           | CAM-B3LYP | 390                     | 325  |                        |      |                         |      |                        |      |     |
|           |           | 306                     | 299  |                        |      |                         |      |                        |      |     |
|           |           | 248                     | 245  |                        |      |                         |      |                        |      |     |
| <b>2</b>  | PBE0      | 342                     | 342  | 339                    | 324  | 410                     | 415  | 469                    | 442  |     |
|           |           | 296                     | 296  |                        |      |                         |      |                        |      | 312 |
|           | CAM-B3LYP | 322                     | 322  | 291                    |      |                         |      |                        |      |     |
|           |           | 276                     | 275  |                        |      |                         |      |                        |      |     |
| <b>2M</b> | PBE0      | 366                     | 362  | 352                    | 337  | 536                     | 528  | 538                    |      |     |
|           |           | 340                     | 334  |                        |      |                         |      |                        | 320  |     |
|           |           | 240                     | 240  |                        |      |                         |      |                        |      |     |
|           | CAM-B3LYP | 332                     | 329  |                        |      |                         |      |                        |      |     |
|           |           | 310                     | 306  |                        |      |                         |      |                        |      |     |
|           |           | 220                     | 220  |                        |      |                         |      |                        |      |     |

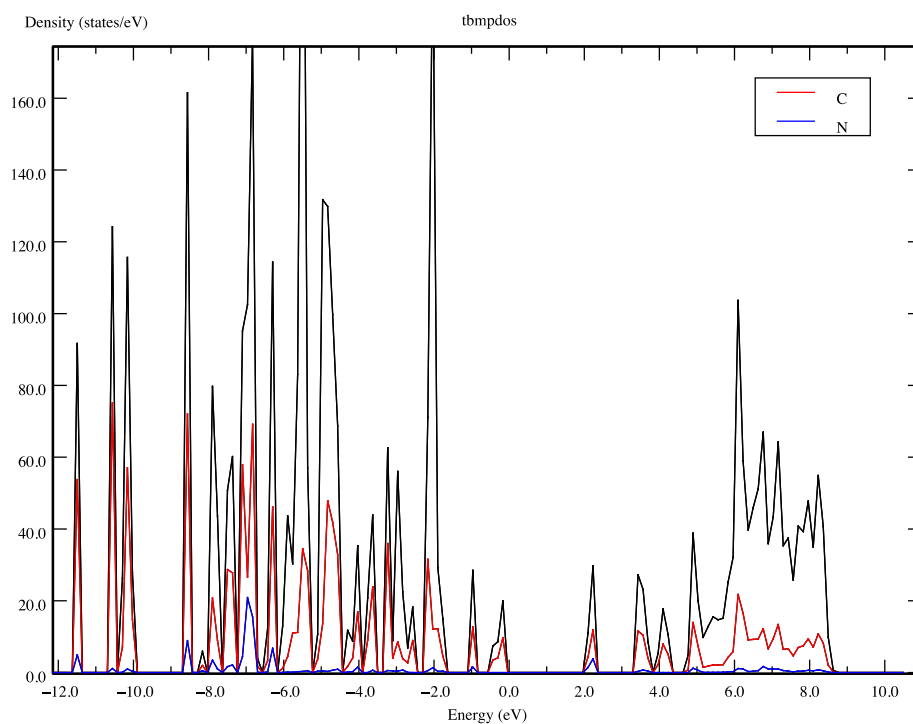

Figure S34: Density of states (DOS) of compound **2M**. Fermi level at 0 eV.

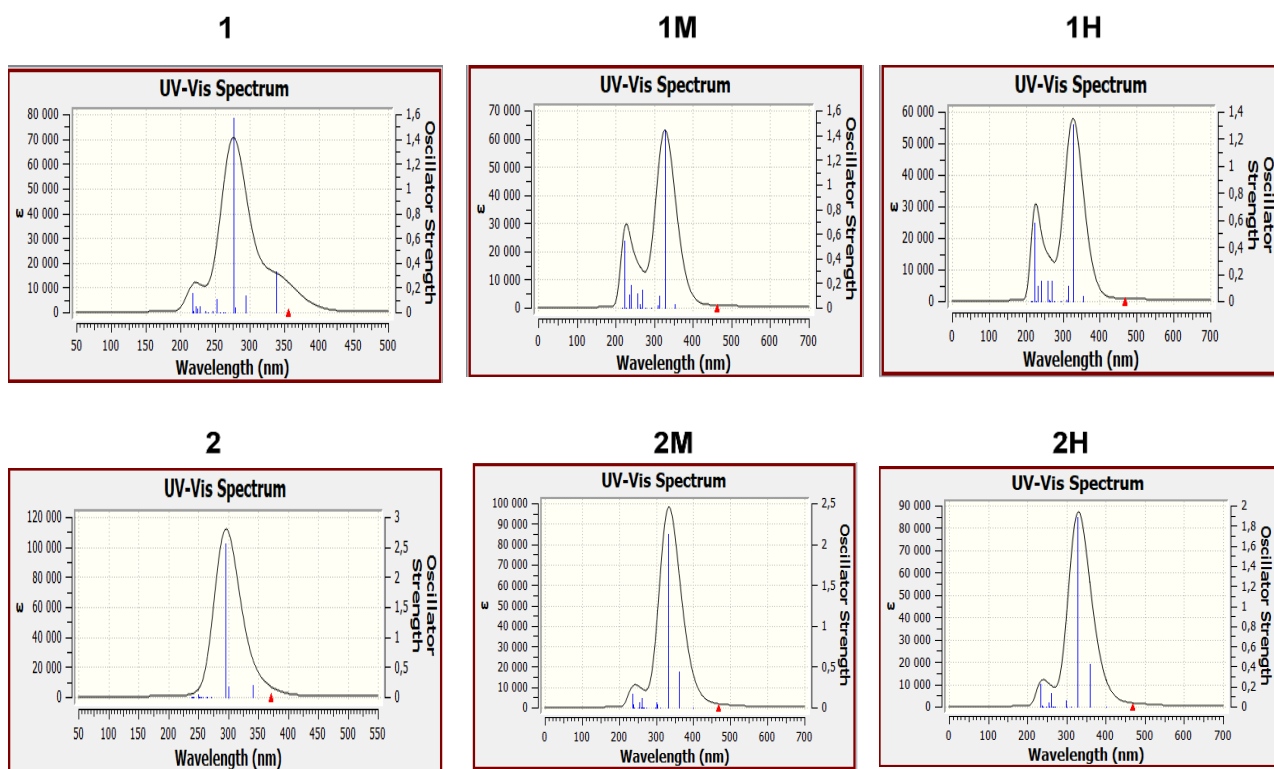

Figure S35: Simulated UV-Vis absorption spectra (PBE0-GD3BJ/LANL2DZP) in MeCN for **1**, **1H**, **1M**, **2**, **2H**, and **2M**.

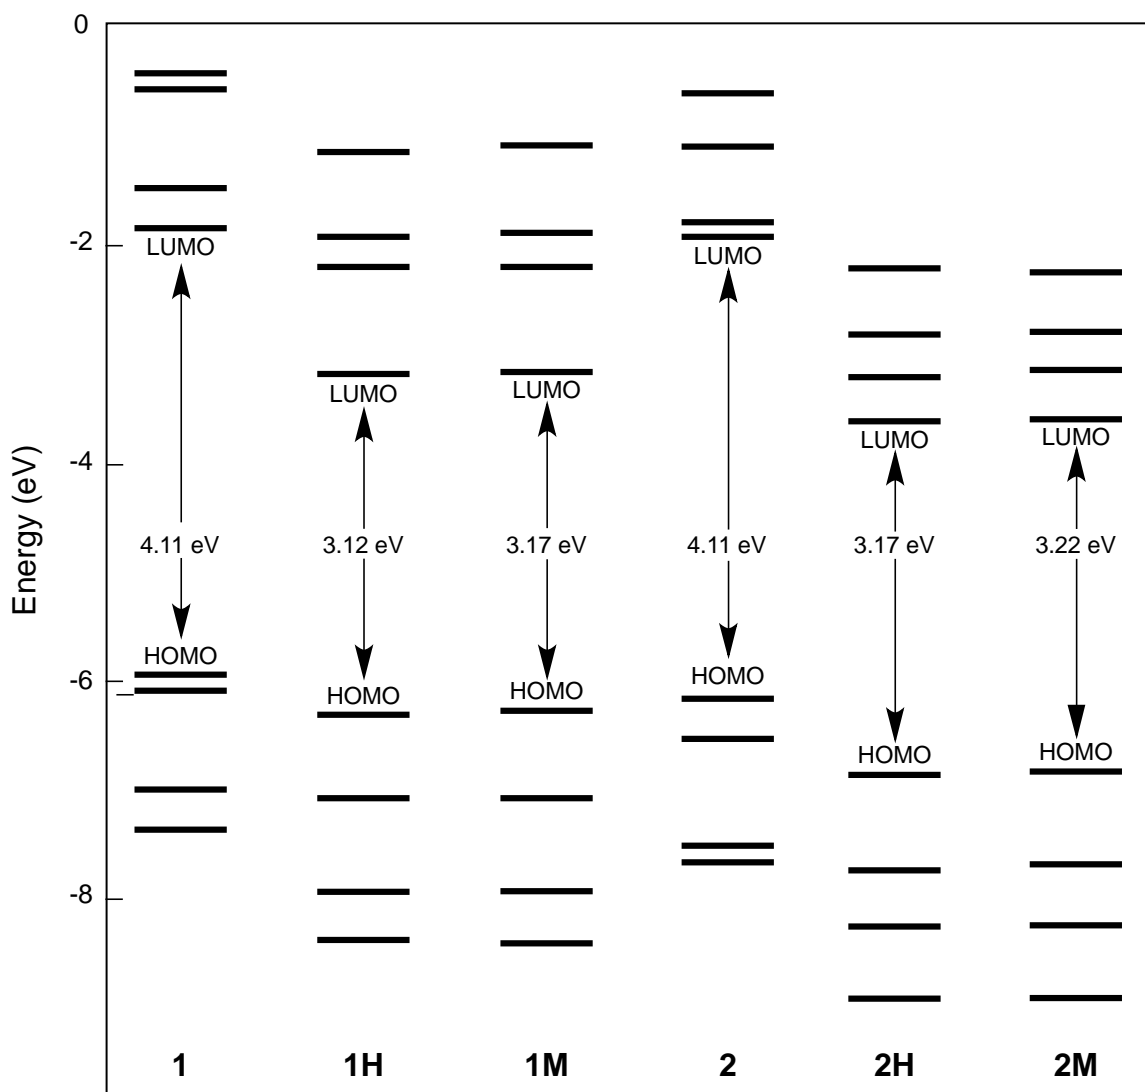

Figure S36: Molecular orbital energy diagrams of **1**, **1H**, **1M**, **2**, **2H**, and **2M**, calculated at the PBE0-GD3BJ/LANL2DZP level in THF.

**Table S7.** Calculated HOMO and LUMO energies (eV), and HOMO-LUMO gaps ( $\Delta E$ , eV) at the PBE0-GD3BJ/LANL2DZP level in THF.

| Compound   | $E_{\text{HOMO}}$ | $E_{\text{LUMO}}$ | $\Delta E$ |
|------------|-------------------|-------------------|------------|
| <b>1</b>   | -5.94             | -1.83             | 4.11       |
| <b>1-H</b> | -6.35             | -3.23             | 3.12       |
| <b>1-M</b> | -6.34             | -3.17             | 3.17       |
| <b>2</b>   | -6.06             | -1.94             | 4.11       |
| <b>2-H</b> | -6.85             | -3.68             | 3.17       |
| <b>2-M</b> | -6.83             | -3.61             | 3.22       |

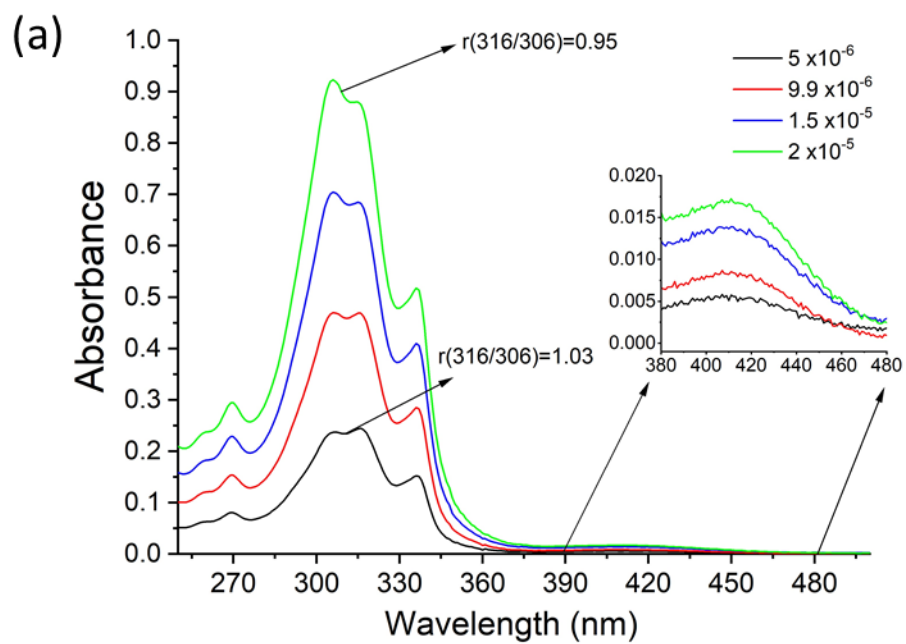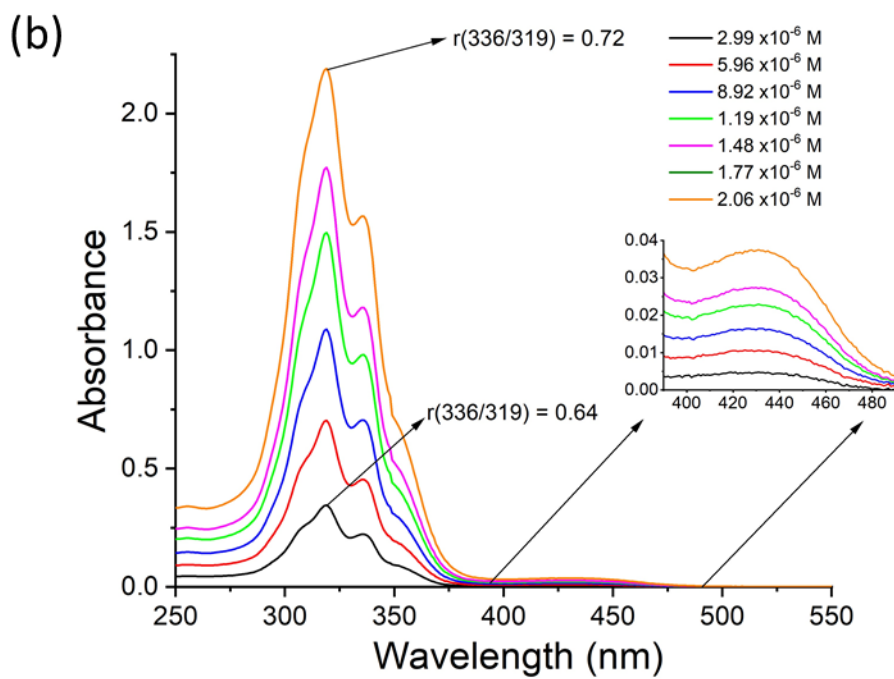

Figure S37: Concentration dependence of UV-Vis absorption of **1M** (a) and **2M** (b) at pH 7.0 with sodium cacodylate buffer,  $I = 50$  mM.

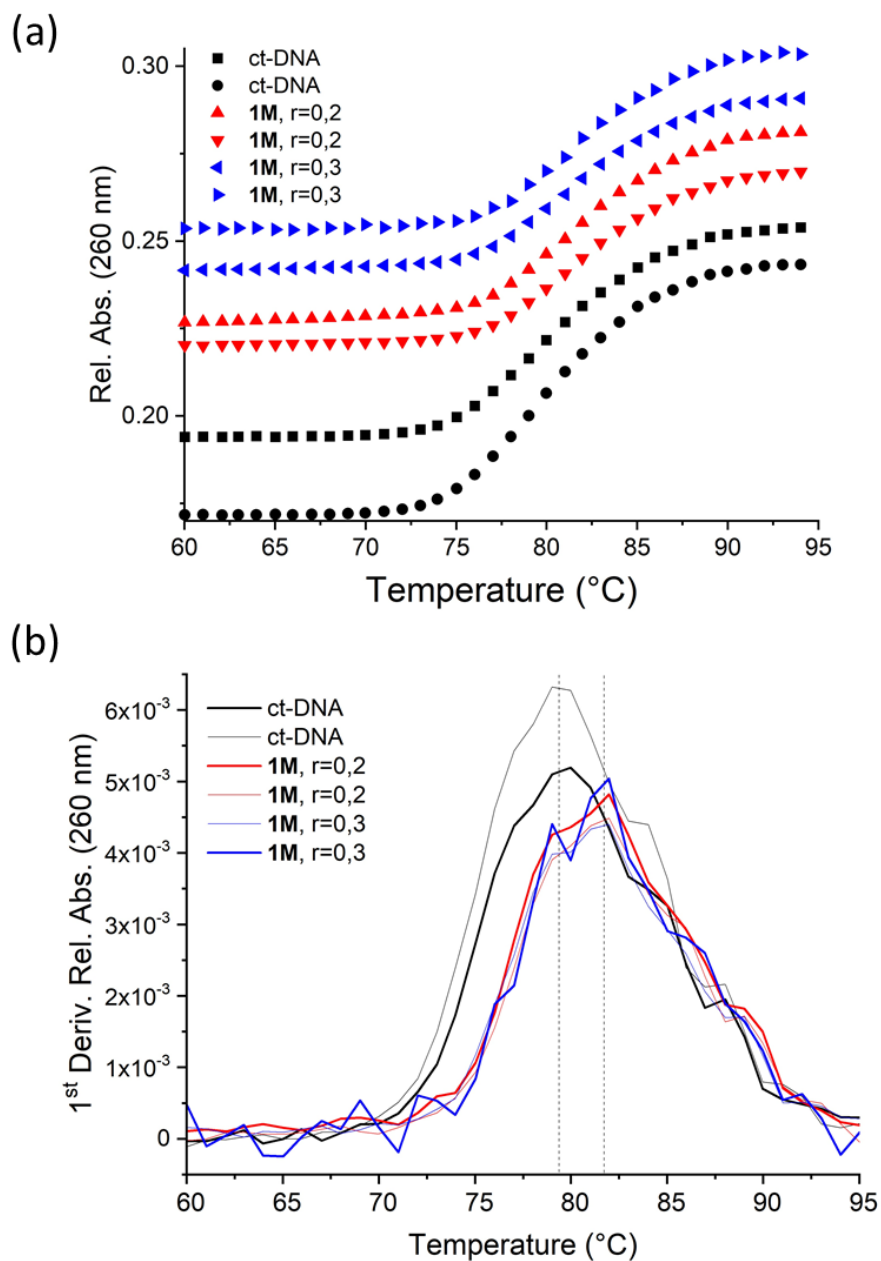

Figure S38: (a) Thermal denaturation curve of ct-DNA upon addition  $r_{[1M]/[ctDNA]} = 0.2$  and  $r = 0.3$  of **1M** at pH 7.0 (sodium cacodylate buffer,  $I = 0.05$  M), and (b) first derivative of absorbance *vs.* temperature.

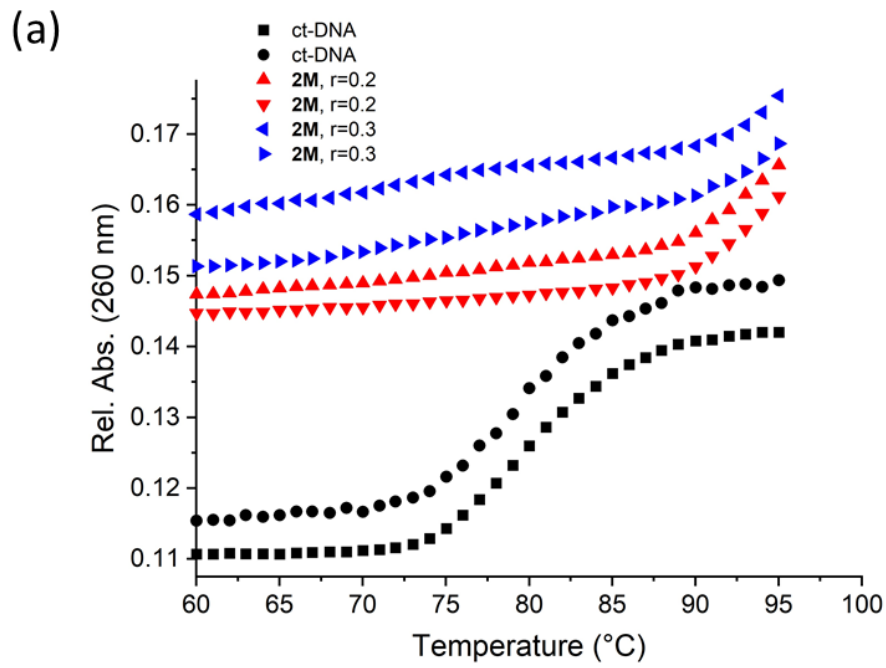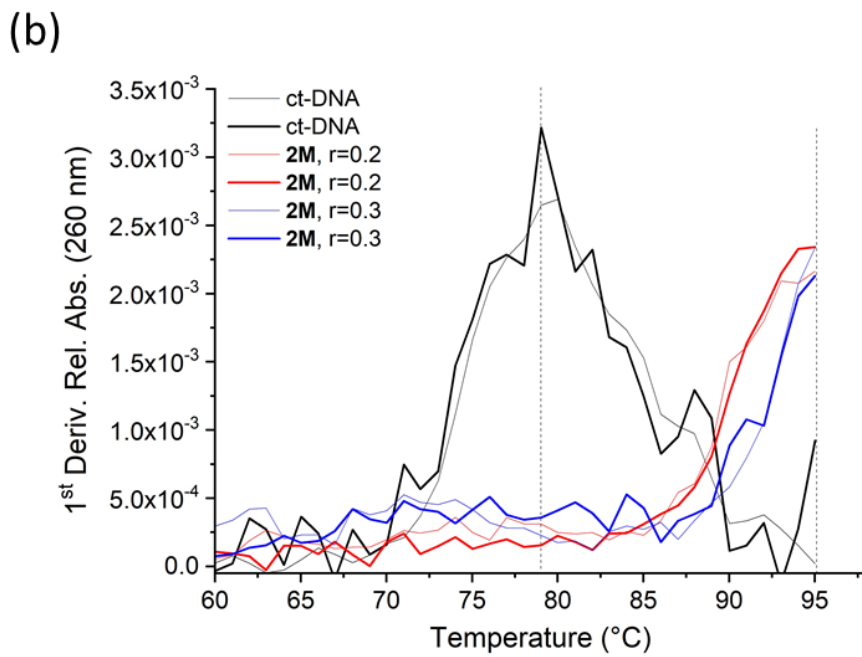

Figure S39: (a) Thermal denaturation curve of ct-DNA upon addition  $r_{[2M]/[ctDNA]} = 0.2$  and  $r = 0.3$  of **2M** at pH 7.0 (buffer sodium cacodylate,  $I = 0.05$  M), and (b) first derivative of absorbance vs. temperature.



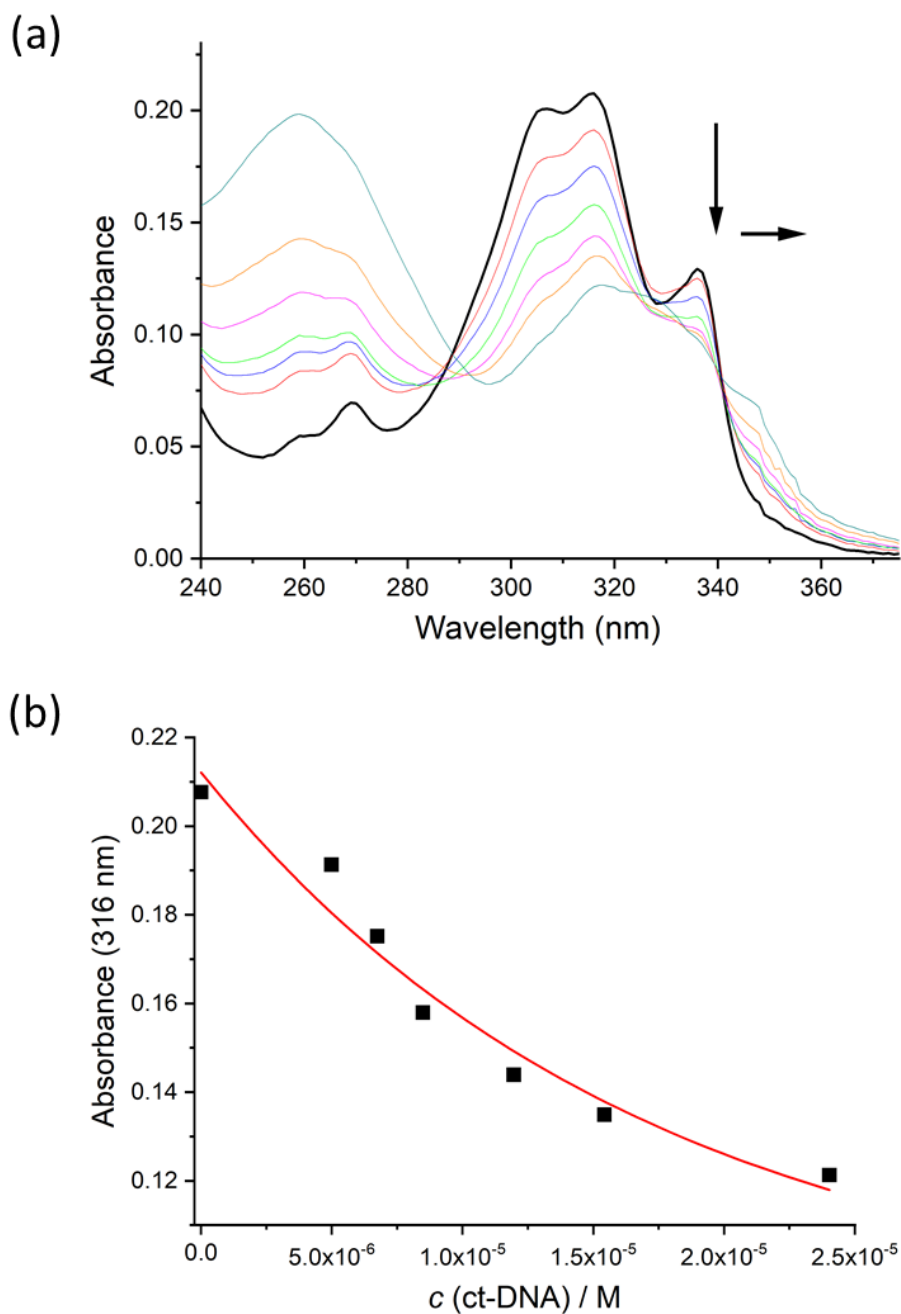

Figure S40: (a) Changes in UV-Vis absorption of **1M** ( $c = 5 \times 10^{-6}$  M) upon titration with ct-DNA, and (b) dependence of absorbance of **1M** at  $\lambda_{\max} = 316$  nm on  $c(\text{ct-DNA})$  at pH 7.0 with sodium cacodylate buffer,  $I = 0.05$  M.

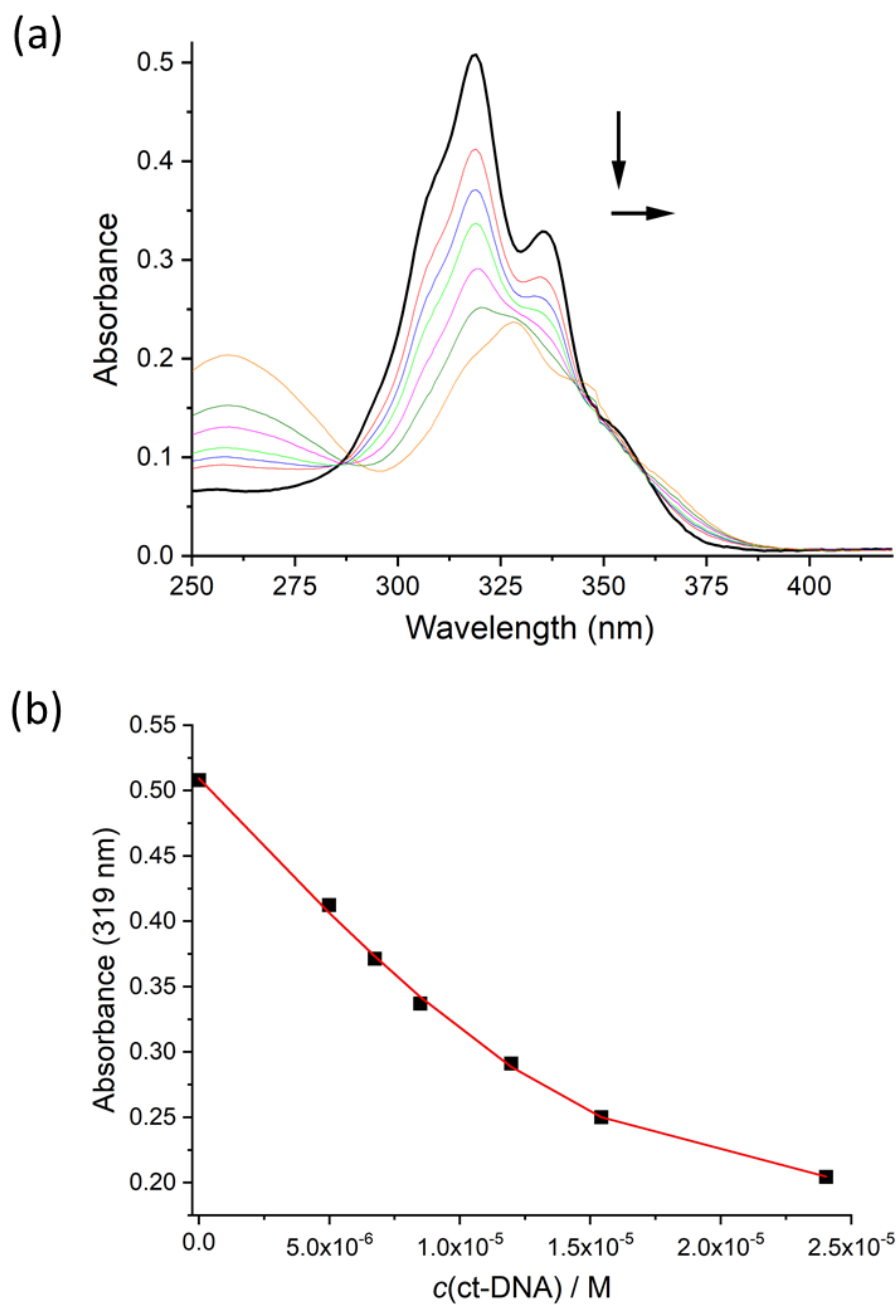

Figure S41: (a) Changes in UV-Vis absorption of **2M** ( $c = 5 \times 10^{-6} \text{ M}$ ) upon titration with ct-DNA, and (b) dependence of absorbance of **2M** at  $\lambda_{\text{max}} = 319 \text{ nm}$  on  $c(\text{ct-DNA})$  at pH 7.0 with sodium cacodylate buffer,  $I = 0.05 \text{ M}$ .

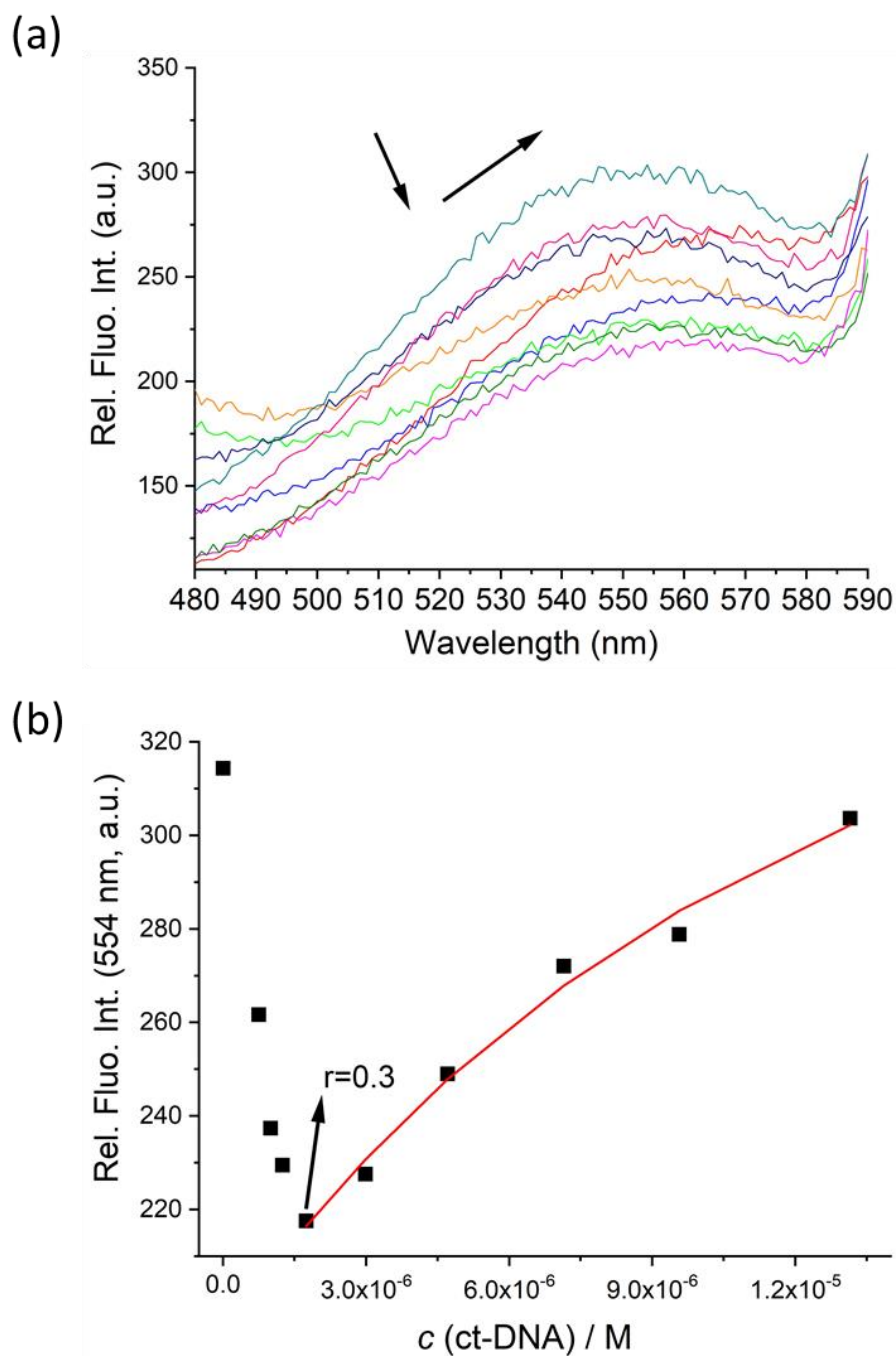

Figure S42: (a) Changes in fluorescence of **1M** ( $c = 5 \times 10^{-7}$  M) upon titration with ct-DNA, and (b) dependence of emission intensity of **1M** at  $\lambda_{\max} = 554$  nm on  $c(\text{ct-DNA})$  at pH 7.0 with sodium cacodylate buffer,  $I = 0.05$  M. The Scatchard fit (—) was applied only for a part of  $r \ll 0.3$ .

(a)

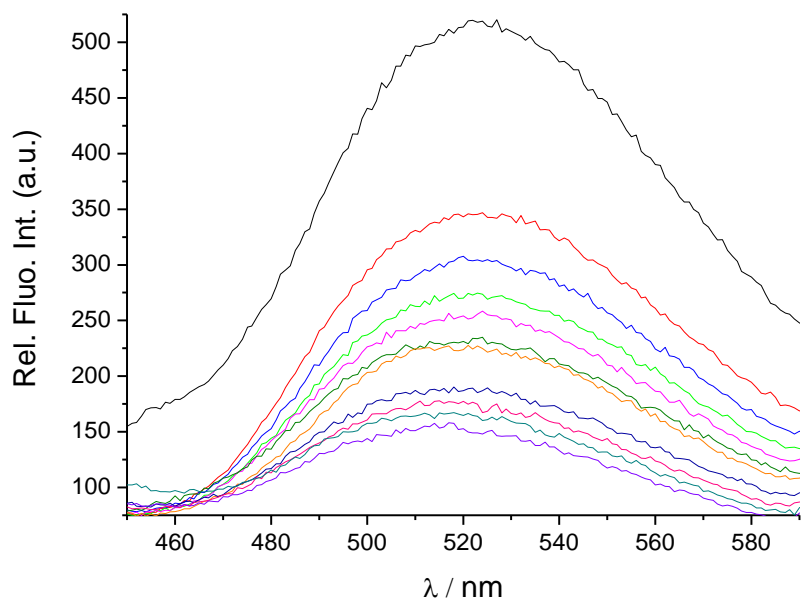

(b)

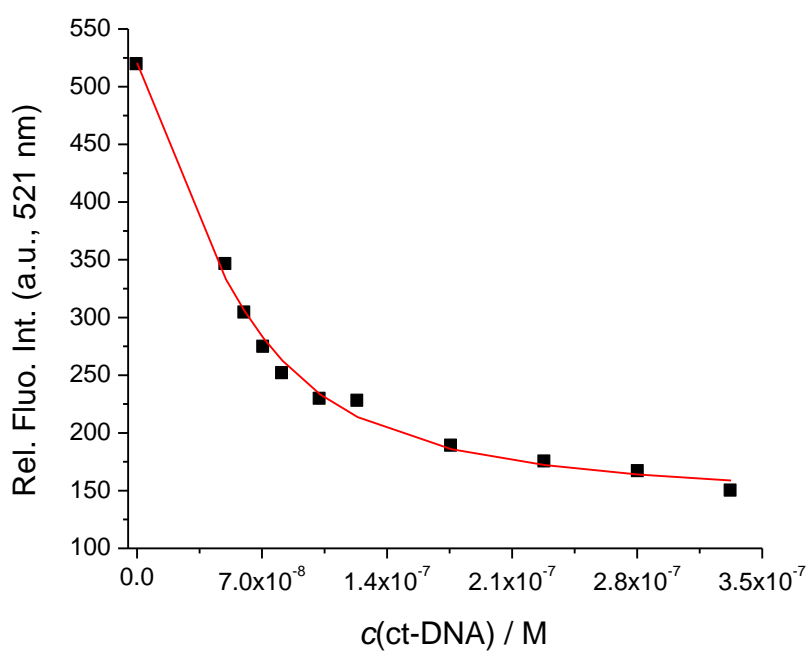

Figure S43. (a) Changes in the fluorescence spectrum of **2M** ( $c = 3 \times 10^{-8} \text{ M}$ ) upon titration with ctDNA; (b) Dependence of **2M** intensity at  $\lambda_{\text{max}} = 521 \text{ nm}$  on  $c(\text{ct-DNA})$ , at pH 7.0, sodium cacodylate buffer,  $I = 0.05 \text{ M}$ .

## Reference

1. Q. Lu, G. K. Kole, A. Friedrich, K. Müller-Buschbaum, Z. Liu, X. Yu, T. B. Marder, *J. Org. Chem.* **2020**, *85*, 4256-4266.
